# Supplementary material for: Biosynthesis of Sesquiterpenes in Basidiomycetes: A Review
Source: MDPI journal article supplement (doi:10.3390/jof8090913), 2022-08-28
Supplement: s1 [file s1]

>STC4 (Genbank ID:KAH0582448)

MVQFRIPDLLSCLPACIKATNADNDILQAGLVVIDQCHLTDHYKKDLKRAQIPHLAIR  
AFPGSDLKYLRICVEYLIAAFLLDRLTDKPATAAQAQEWADIYKQYFRKTLQGTKGP  
INQYLTKKCDIYPQAFSKTFEKTGPAEIKYLTSHMSNTIKDPYWSCLVENNILLADGM  
AKEAVDRENPGTEM DLETYIKVRRDTIGARQLFDLGRWIELNITPETLTHPDIVRMEE  
QFIDLISLANDLYSYKKEYLAKDAKHNYLTIALRDPTADLHENDLQGAINYTYDKFCQ  
VLTDLQKQKVLPRFGKSEEAKVDKYFWLMMNVVIGTIQWSLECERYGHFVDVDGP  
NQGDVVFNL

>STC9 (Genbank ID:KAH0583476)

MFRFDHPSSFILQNICDITGAVFELKENPLREQANTAVLKWFKGFNVYDKAQGEKFIN  
AGRFDIFAALSFPEADIEHLTTCLAFFLWAFSTDDLSDGEYQSKPEKVRRGHEISCSILH  
DDSAPQPSYPYAGMLWDLLRRLRANGKSGMYKRFKQAFLDWSSSQVQQSLNRNLDRI  
PPVDEFILMRRTIGAAALVEAMVEYSLDLIPSFVWEHPVIIGMSQVTSDIMTWPNDLC  
SFNKEQADGDNQNFVQVLCVLAHNLNLQEAVDLLTKMIADRVQDYVKLKKRLPSFGP  
DIDPAVHKYVDALEQFVQGCVVWYSSPRYFPDIDPRGKSKAEIHLLSKPISSDPVQMH

>STC15 (Genbank ID:KAG5341349)

MSAATSQLLPSALATKIILPDLVAHCDFTLRYNRHRKQITRETKRWLFKGGNLNGKKR  
DAFHGLKAGLLTAMTYPDAAYPQLRVCNDFLTFLHLDNLSDMDNRGTRSTADV  
LNSLYHPHTYYGPERVGKMTDRDYKRMIVTASPGAQQRFIETFDFFFQSVTQQAIDRA  
NGVIPDLESYIALRRDTSGCKPCWALIEYANNLNIPDEVMEHPHIVSLGEAANDLVTWS  
NDIFSYNVEQSKGDTHNMIPVVMNEEGLDLQSAIDFVGNMCRQSIDRFVEDRTNLP  
WGPEIDKDVAVYVNGLADWIVGSLHWSFESERYFGKTGREVKANRVVNLLPRRA

>Cop1 (Genbank ID:XP\_001832573)

MVNLWYWQGGQGNISKSIGPPSQTYTKSVLREQSMTFRMLALQSGLKSAASDHVSTSG  
SGILRFLSRILPANTTRRCSACCTEMSSLDATIHVPLNFEDKKIVLPDLVSHCNFKLRVSR  
HRKRITGETKRWLFKGDNLVGPARNKYHGLKAGLLTAMTYPDAAYPQLRLCNDFLT  
LFHIDNLSDMDNRGTWSTANEVNLNSLYHPYTYHGQARVGRMTRDYWRRMILTASP  
GSQQRFIETFDFFFQSVTQQAIDRLTGEIPDLESYIALRRDTSGCKPCWALIEYANNLDLP  
DEVMDHPVVRSLGEAANDLVTWSNDIFSYNVEQSKGDTHNMIPVVMHQEGLDLQSA  
VDFVGEMLDHTSTCCGLESPLWLTPPLRIRRNAPRLYRVFL

>Cop2 (Genbank ID:XP\_001836556)

MPSPAGALPKSFILPDLVNDCPFPLRVNPLCDEVGRLSEQWFLRHANYSPPRAVAFMA  
LKAGELTAACYPDADAFHLRVSDDFMNFLFNADDWLDDFDIEDTYGLANCTVRALR  
DPVNFITDKRAGLMTKSYFSRFLKTAGPRCTERFIQTLALYFESVVTQKQARNNGTLPD  
LESYITIRRNNSGCKPCYALIEFCAGIDLPDEVINHPIIQSLEDASNDLIAWSNDIFS  
NREQSRHDSFNMVSIVMHQKGFALQEAVNFVGELCKKAMERFQADKRNLPSWGPEIDGE  
VAMYVDGLQNWIVGSLNWSIDGTERYFGKDGPGIKKHRKVLFPKRPLKTPAVRVLA

>Cop3 (Genbank ID:XP\_001832925)

MSTPSSSLTTDESPASFILPDLVSHCPFLRYHPKGDEVAKQTVHWLDSNCPDLTAKERK  
AMYGLQAGELTGICYPYTTPERLRVADFLNYLFHLDNISDGMMTRETAVLADVMM  
NALWFPEDYRPTKGQAAEELNPGKLARDFWSRCIPDCGPGTQARFKETFGSFFEAVNI  
QARARDEGVIPDLESYIDVRRDTSGCKPCWVLEIYALGIDLPDFVVEHPVIAALNQGTN  
DLVTWSNDIFSYNVEQSKGDTHNMIIILMEHHGHTLQSAVDYVGSQCQQTINTFCENK  
QQLPSWGPEIDDMVAKYVQGLEDWIVGSLHWSFQTRRYFGDEGQEIKQHRLVKLLTV

APPPPPPTPPQSSDADTKKQKVKAQDGKGPVSDEEVWALVRAEQSKGSILESFGF  
LTTLSRIFFGYF

FAYSH

>Cop4 (Genbank ID:XP\_001836356)

MRPTARQFTLPDLFSICPLQDATNPWYKQAAAESRAWINSYNIFTDRKRAFFIQGSNEL  
LCSHVYAYAGYEQFRTCCDFVNLLFVVDEISDDQNGQDARATGRIFVNMARDAHWD  
DGSILAKITHEFRERFVRLAGPKTVRRFADLCESYTD CVAREAE LRERNQVLGLNDFIA  
LRRQNSAVLLCYSLVEYILGIDLDDEVYEDPTFAKAYWAACDFVCWANDVYSYDMEQ  
AKGHTGNNVVTVLMKEKDLSLQEASDYIGRECEKQMRDYLEAKSQLLQSTDLPQEAV  
RYIEALGYWMVGNLVWSFESQRYFGAQHERVKATHVVHLRPSSVLEASCDSDSDSDC

>Cop5 (Genbank ID:XP\_001834007)

MVGSYTGKVIHVPALLESWPWPAAINPLYEQVQEESTSWFRKFDLYRDRKKQAIHDHL  
DTAKFGASVCPKADYALLRLATDYLHLGFWIDYFFDTSPSDVIRQLTESIAHLLSGDPR  
LDSSSPQSHIACMEILRDFRKRIETFNPSQEDLRRFVKEYRGFLEAELTQAIDHENKVIRD  
IESYLSIRRSTIAIRGIALGLALGIPQEILDDPYTDTLTNACLDMVIIQNDAYSWNVEQV  
RKADGHNIITVLMKQRDIDVQEAYEHAAQLHRETQEHFLELHAKRPDWGNEGSIQAF  
FDGLGEFVRGVDEWSSMCLGEHALSVGAGFLK

>Cop6 (Genbank ID:XP\_001832549)

MPAALPYNVSRDNKWDIKKIIQDFFKRCVPHYQVIPYDTELWNA CLKRAKEKGY PVE  
PDSPMSLYRSFKVGVVITRTSYGHIQDYEILIWVATFTAFVTYADDAFQEDIQHLHSFAR  
TFLQNEKHEHPVLEAFAQLRESSIRFSHFVANTVVSSALRFMMSIALEFEGQNVSVSTE  
AREYPGYIRILSGLSDIYALFAFPMDLPRSTYIQAPEQIDYINGTNDLLSFYKEELDCETV  
NFISAAATSQQVSKLEVLRNAAEKAAYSVDVVNVLPYPEALAAWKSFARGFCYFHT  
SSPRYRLGEMFHDFEHDLVCKCASCTEI

>AcTPS4 (JGI ID:M\_Fcontig40411)

MSAQQFTLPDLLAVCPKDATNPHYAQA AAESTAWVKSYNIFDARKLAFL LQGSSELL  
VSHAYPYAPYEQFRTCCDFVNLLFVVDEVSDQNGKDARRTGEVYLNVMRYPDWDD  
GSALAKMTREFKQRLLA FAGPNSYRRFLMHCDYVNAVAREAEYRERGEVLDIDAFQ  
TLRRENSAIRLCFGLFEFALGIDLPDFVFQDPHFMTLYWSAADMVCWSNDVYSYNME  
QAKGHTGNNIVTVLMRQK SIGLQEAADLVGAHFSA LMGRFVETKKQLPSFGAAALD  
DAVAKYVAAMEHWVIGNLEWSFESQRYFGAEHTRVKATRVVVLSPADEN

>AcTPS5 (JGI ID:M\_Fcontig40579)

MAVTPAPVNGSDSTKEIILKFPDFISIPYPLRCHPQEREVSRQSEEWLLSMANFSEKQR  
AKFLTLNAGLLSGWCYIDCTFDEL RVCTDFMNFLFTLDDWTDEFDTTGTRGLAECVM  
NTLYFPD TYKSDTAAHRLTKSFWERM RATAGPGCQQRLLSTLD TYFQAIMQQAADRG  
SRNIPDLEEYILLRRDTSGCKTGFAFIEYAANIDL PDEVIEHPIKAMSDSTNDLVSWAND  
VLSYNAEQSRGDTHNLV CVLMHQNNVDRQEAIEQAGELWRKTLDYFECHKALPSW  
GPEIDRAVALYVQGLDDWIIANA EWSFETERYFGKEGPTVKKTRQIPLL

>AcTPS9 (JGI ID:M\_Fcontig47706)

MSSPSSFVLPDLHAVTPFKGSFNPHYPEAAAESSEWVNSYKVLSDKKRAFFLQGGSELL  
CAHAYPYAGYQQFRTTCDFVNLLFTVDEISDDQNGKGAYETGLTFYNAMSNPAYDDG  
TVLCKMTKEFTARLLEHCGPQTYRRFIKHCKDYIEAVAVEADLRERGEVLDLEAYQTLR  
RENSAVRFCFGLAGYALGIDLPDEVVEHPAFMAMHLSTVDMVCWSNDLYSYNMEQA  
MGHTGNNVITVLMQHKGLDLQGAADYTG VHF KGLIDTFLDAKRSLPSWGP KLDGEV

AQYAMAMETWVIGNLNWSFETQRYFGHARHEIKRTRVVQLYPRRIVEESSDEE  
DN

>CpSTS1 (Genbank ID:LC436345.1)

MPAAIPKFYTLPTDLRNWPWKREISPYRQCQAESVAWLESFRPFSPKAQVAFNKCDFS  
LVSALCFPKGSPYNLRSVCDLMHTFFTLDEYTDYLDLEGVKTLCATMDAIRNPDKPR  
PEGEHFIGEVARQFWARARVNATPACEERFVKSWRTYLNVIQQAERRDAKYICTMEE  
YLHARRDNIGSDPSFALLEITLEVDLPHEVMEHPTIVALARDTTDMIVLANDMCSYKK  
EIIADDANYNAVTVVMHNNHNTNVDGGIQWISDYHDTIVDHFLRLREDVRLKQNGFPS  
WGARIDREVEAYVEGLGLWIRGHDEWNFGSGRYFGDEGLEVQKSRIVECTVSADPFTP  
FLIQEEEEVDENAA

>CpSTS2 (Genbank ID:LC436346.1)

MMQFYLPALVEQCPIEGGTNPHEYQGAESRAWINGYNVFTDRKRAFFILGSNELLCS  
HVVYAGSEEFRTSCDFVNVLFIFDELSDEQTGKDALETGQIFLNAMKDERWDDRSKF  
SSMTKEFRKRFLRRSGPRGTARFLKHWEYCAAVIREAELREMDEVLDLEDFINLRREN  
SAVRLCYGLIEYCYGIDLPEAVYEDSTFMDIYWAAVDLVCWTNDVYSYDMEQSKGIAG  
NNIVTVLMNRNMSLQQASNYIGQHCETLMDRFVSSQVRLPSWGPVVDREVRLYIQG  
LGAWIKGNLDWSFETQRYFGPMHEEVKSTRLVTLRPRERIEECSDSDSDFE

>CpSTS3 (Genbank ID:LC436347.1)

MVATTASTQPDHFVLPDLVSHCSFPLVYHTDGDRIAAQSVNWLDNSNCPDLNAKQRVA  
LRGLQAGELTAFICYNTCTPERLRVVSDFMNYLFHLDNISDGMMTRETDLADVVMN  
ALWFSKGKYMPTKEQSADENLPGKLARDFWARCIPDAGPGCQARFKETLELFFEAVNIQ  
ARARDDDDVVPDLESYIDVRRDTSGCKPCWALIEYALDIDLPDFVVEHPHIEALNQSTND  
LVTWSNDIFSYNVEQSRGDTNMMIVILMKYHGHTLQSAVDYVGDLCQKTIDDFQANR  
QKLPSWGAEVDEMVRQYVVGGLQDWIVGSLHWSFQTHRYFGADGANVKKNRIVKLL  
PLKA

>CpSTS4 (Genbank ID:LC436348.1)

MESNQHLRIPHTLTAWPWPRTLNPPYQTVKAESSAWLESFKAFFDPAQAGFNSCDF  
NLLASLAYPLASKEHLRTGCDLMNLFVIDEYTDIEDEVHAAMVASVTMDALRNPFPK  
RPRGEIIIIGEIRQFWARTVPTITEASHRRFIETFDTYLQSVVVQARDRSKQHRSIQDYL  
HMRRDNIGAKPSFAILELSLDLPDYVMSSHPSIQTATVTAIDMLIIGNDLCSFRNEHARG  
DDTHNILTARHEFGQGLGHAVNWIESYNKSLRRSFLSAIERVPSWGEEIDTQVAEYLY  
GLANWVRANDCWSFESHRYFGKHGREIQVHRVVDLACGHPECVQDNEVEKPAT  
KGLLYEVEKKTYVGPLQVNTKDPIAFRSDFPLSARPKDITSTPTRLTCVALLCTLSTFIGW  
LVKL

>CpSTS5 (Genbank ID:LC436349.1)

MVATTASTQPDHFVLPDLVSHCSFPLVYHTDGDRIAAQSVNWLDNSNCPDLNAKQRVA  
LRGLQAGELTAFICYNTCTPERLRVVSDFMNYLFHLDNISDGMMTRETDLADVVMN  
ALWFSKGKYMPTKEQSADENLPGKLARDFWARCIPDAGPGCQARFKETLELFFEAVNIQ  
ARARDDDDVVPDLESYIDVRRDTSGCKPCWALIEYALDIDLPDFVVEHPHIEALNQSTND  
LVTWSNDIFSYNVEQSRGDTNMMIVILMKYHGHTLQSAVDYVGDLCQKTIDDFQANR  
QKLPSWGAEVDEMVRQYVVGGLQDWIVGSLHWSFQTHRYFGADGANVKKNRIVKLL  
PLKA

>CpSTS6 (Genbank ID:LC436350.1)

MLTTPYFTIPDLRNWPWKRVLNPHQKVCCEEAADWMRSCGAFTPKSQNAFDRCSF

GLLGSLAYPRLGRDGLRIACDLMNMFFVIDEYSDVASGREARLQADIVMDALYNPLVP  
RPVGEWIGGEVTRQFWANAIKTATPSSQRRFVRNFQRYVDAVVQQAQDREAHCIRDV  
KSYFILRRQTIGAIPSLDLLTLEMDLEDEVLDHPHAKLLELCVDMILIGNDLYSYNVEQA  
RGDDTHNFVRIVKDERKCNLNDALRWISDYHDLADEFLNLMHNLPSFGSKLIDEQV  
KTYVDGLGNWVRANECWSFESERYFGKKGKLYQKSRRVRLLPSSIALQGQNIDPQAA  
VEISDLPAAGIIV

>CpSTS7 (Genbank ID:LC436351.1)

MTTSGFRIPNLVVAWPWLRAVNPHMDQTSQNSSSWLENFHAYPPATQENFNRCDFGL  
LAALTYPIASKEHLRTGTDFMNLFFIDEITEIGDETFTSEVLYIAMDALRNP SKLRPKGE  
HVVGEITRQFWERSIPHITATSHRRFVCALEYLKSNNVQARDRSSQHIRRIEYFSTRR  
DNIGTKPAFVLELGLDIPDCVMTHPSIQSAVTSLTDMLIANDVFSFKVEHSRDDAN  
NVLKVVMCELRCNLARAIEWADERNQQRLRTTFLSSIAEVPSWGGQVDIQVSEYLYGLA  
NWVRANECWSFESQRYFGTHGPTVQKDRWVSLDCGHPQCITGGTTTPRTSYRPLYVG  
MLGIATYALSQYGLMSRATLLRR

>CpSTS8 (Genbank ID:LC436352.1)

MSNTFIVLPNLEETVYSAFPDHGLNPHYDAVCPHSRAWIKSYSDPIFGPKMRDFMEKC  
DFELFAAYICPRASPEALRTSMDIGNLLWLYDEYTD AEDSVTVKKA EAIVVRTLQDRSF  
DDGSWICRLVKEFLDLHVRKKAGPNVSRRFVGHFVDYVVRVSDEATQRRERHEVLDIEA  
YVERRRESGAIRLTFDLIESGLHIDL PQYVHEDPAFIAGYNATMDLACWVNDVYSYNM  
EQAKGHEASNILTVLMKYEHLDLQAAVEYVAKHCEVLAAQFIEAHANLLARS DPNFS  
EDAARVLDALGDAVIGNDRWSFETERYFGKDYKAVKQSRIVKLAGRAEGKHALRN

>CpSTS9 (Genbank ID:LC436353.1)

MTVLQFVFSVFTSSKPQTFFLPRLDET FKVLPNNGLNPHFSTVRPQSRAWIKQYDGEVC  
GPKMRAFMDNCNFELS NAYTYPYAEPAGLRAAMDLTN ILWLYDEYTD TEDGASAERA  
AVIVNRALKEPGFNDG SWICRMMQDFRRRHIDKAGPDVARRFITNFCNYVDRVAREA  
ILREKNEVLDIPSYILFRRETS AVKTCFDIVEYCLGLNLPQYVHDDPVFVSGYNAAMD LV  
FWANDLFSYNMEQAKGHSGANIVTVIMKSKRVDLQTAADFVAGYCEALTAQLLEAK  
QILSSRSDPAYSKDAVRVLEAFGDWVRGNDDWSFATERYFGKENNAVRESRIVVVRAP  
FDETVKLVE

>CpSTS10 (Genbank ID:LC436354.1)

MAPSYQLPDLPSLSRSFELRANPACKITTKASEASLIESKSTNGSHVLSSLERERLAAMK  
VGLLAAICFPGSDPTQLRLLTDFLTTLV LATTRVKYATLSPQVLTYWTTVDDNDGVWSL  
VHHD MFNCLKEPLERLASKANQNWKARFGSSVKSFR IACSSVTEDMDILDPEIETYL  
SMNRDLSGLSMIFDLFELTQNLTLTVTDE TITRTLDKLKV LATDIVSCSVDVAAFN YDQ  
ARGNEKNLISLLMRHKRLSVQGALNYAGTLIKQYIDAFMAEERSLLDPTPSPPSNGSSLI  
PSWIPFTPLVASATAIPPSTPPDPVSKADLT VYVQMLRDCIVGT LNWIYETDLYFGKKGE  
EIRTFGWIFLSPKVQNNDSEREVP GDNVLP

>CpSTS11 (Genbank ID:LC436355.1)

MSQKSPSTFRIPDLEAIFSAFPDEGTSPYYDDVLPEARAWIKLYQDQVYGPKMTEFIDRC  
KIELITYYVHPVASRSCVRAMMDLHNLFWLYDEATDVQSGQTAQETAKVVRNSLTSPE  
FNDG SWLCEMLQDFRKRHLDGVRSSSFVARFIEHFCFYTDRVADEAIYREKQRVLDIPS  
YMAFRRETA AAVRVVMDTVEYCAEELPRTVLDDPVFQVAYDAALDLA FG TNDIHSYN  
MEQSKDHSGANVITVIMKERGLDVQGAMDYFGGYCEALTAQFLDAKRKIEKREGQE  
WKDAVLILDGYTHFLT GQVRWGFATERYFGKKNKEVQETRVELRAPFVDHVDLAD

>CpSTS12 (Genbank ID:LC436356.1)

MESLPVTLVLPRLDDIFDDLNNVNNPNYSIACPASRLWIEQYGTQIYGPKMQAFMNN  
CNFELSTTYTYPYADAKRLRATMDLVNWLWLYDEYTDASGAHAKEMASIVYQALSGQ  
QVAANSWVGCMMDQDFYRQHIEKAGPNTSRRFVDHFCRYAQQVGEEASLREQRQILN  
MHEYIDFRRETSGVRSCFDLVEYCLGIDLQFVHDDPIFTMGYNAAMDLVFWVNDLYS  
YNMEQAKGHGAANVVTVMKSKSLGLQAAVDHLADACEVLTAQFLEAKSRLSKHPE  
SIFSKEAVKVLDAYGDWVRGNEEWSFVTERYFGKENKAVRQSRMVKIKTPFGEMAPFS  
GRKNYL

>CpSTS13 (Genbank ID:LC436357.1)

MPQDPPTTFRIPDLETIFSVPDEGTNPHYDDVFPEAREWILRCKVELLTCYIYPSASKSR  
LRSMMDLYNLFWIYDETTDVQTGQEAKETAQVVRNALTNPDFSDDSWLCAILQDFRR  
RNLDGIMSPGFVLRFDHFCDYANGVADEALFREKDLMLDIQEYLKFRREAAAVRVVL  
DSVEYCLDLELEQNVMDDPVFQMAYNAAALDLAFGTNDIQSYNMEQAKQHKGANIIS  
VIMRARTLDLQGAMDYFGGYCQALTAQFLDAKCIIEKRVDRPEWKDAVRILEGYGCFL  
AGQVRWGFTTTERYFGKKNKEVESTKVVELRAPFVDHVHISD

>CpSTS14 (Genbank ID:LC436358.1)

MNVMNTPITTATMPVSPPCPNPDPTFQTRLSARWHPSTAEIVPKVRQYIVQNWPSSE  
ESKRRYLTGNAEDGVMYAFPGVKNDRIEAVTTWLALHFLIDDYILESVSDSAASGLDP  
GKKKEAIQRLFGIMRRLVRPNVNNPVEVMVDHVASSFLSCSSEDEVAQRHARQILESTI  
QFITAAENGDKATAMGDLNSYLAYRMVEAGVFLSLDLAFWGGEIYIPSHISNDPQIRS  
FFKLVSDDLVLVNDIYSYKVEQDRSEGVGGAFAVSVLMRSKHVDAQDAMGIIKTQLT  
TLEEATLEEAAVLRDRYAEEKGEEVEVDKMIQTILEMMAGNCEWSKFCGRYNSSPVSD  
EASVGTDRALEQGTLS

>CpSTS15 (Genbank ID:LC436359.1)

MSSHRPTQQPNPLVDPPDFVSKFLAHDREDRDEIITSVQAYFLAHWDWPSPTRKAWYS  
KADLEDWTTLMCPAGPSERAWAFTAYVTFWFLYDDLMEIMGPEELGSSIPRIARILHGE  
EGLEDMTTPEFILKEICLKINTIAPGKRIFEATLVYMKAATAKQERLQSLTLGFDAYLYR  
MLDAACWLTLEGAYWVQEITPEHLKTEKIWLQELSLFHGILINDLFSYRKEVKASSQ  
EVQDHDKTLYNGLVILMQSYQFTLLEALEEMKKKIWDYEDFMAVLDDVRETHKSSA  
EDREFIERLAVALMDVIGGNVAWSACCGRYNRL

>CpSTS16 (Genbank ID:LC436360.1)

MPLPVTFRPLDLSSIFSIFPDLGINSHYECTYPESREWIAQYHTGVYGPKNRDFMERGKI  
ELLGAYTYPYASKERLRFVMDLHNVSWLFDDESDVKTGQQAGVTAVVFRRALIDPEFN  
DGSWLCHMLKDFRQRHLDNVMSHAFVEMFIRDFIGYADGMSAEACYRDLNKKVLDIA  
GYVKLRREAGAVRLALHSVEYCLEKELPSYVREDPAFVIAYNGALDLGYIVNDIHSYN  
MEQSKGHGHHAANIVTVFMEAQNIGLQAAMDYAGGFCHGLVLQILEAKELLAARSD  
PVFSNDAVKVIEGCINFFKGQDIWDFESERFFGKSKDAVRKTKVVNLRALFEDSVNLNE

>CpSTS17 (Genbank ID:LC436361.1)

MNSDLQSTLASLDTTYTCRFRARYHAKSEQVMTVVQDYFVKRWPWRSEQAKQLYIKT  
NLEEATCICFPTTLDDRIETVVTWFCYMHILDDIIEGLEANKATKLVDRLSNIILGTLDPD  
PEDRLGVMAADVCSRFLGENDGEEKHGLDIISECKLLRHTSSADSKLQSLSTYDTFIE  
WRELDVGLWFSTSLFLWGCGLYMRLHMSNDPEVRQLLRVSGRHIAVANDLFSYRVEAL  
RAGQTSQILLNTIAIIAKEKQVDPQTAMNMTKQRLSEMEEVEVLIGKLRDRYTGEEGE  
LIERLFVVCKGMMAGNCEWSSICFRYNGAQRAVA

>CpSTS18 (Genbank ID:LC436362.1)

MVHWNHPPTFVLRNICDITGRVFELKENPRIAEANS AVLKWF EQFN VYDKKKADKFL  
NVGKFDIFAALSFPEADLEHLTTCLIFFLWAFATDDLSDEGEFQS QPDQVQHGHDISCSI  
LDDDDAPQPDYPYAAMLWDLRLRLRSTGHMGM YKRFKQAF LDFSSSQVQQSTNRNV  
DRIPPVDEFILMRRKTIGAALVEAMVEYSLDL DIPSYVWEHPVIVGMSQATSDIMTWPN  
DLCSFNKEQADGDYQNLV CVLQHNHGLELQE AIDLLTKMISDRVQDYVDLKNQLPSF  
GPDVDPALHTYLTALEQFVQGT VVWYYSSPRYFRHLDPRGKPEVLIHLFPKTDAPTLPV  
VVQEKS RPFIEREIYLP AKRLLGVFVNYVAITVFGYSVYRLYGDS

>Hfas94a (Genbank ID:MK287936.1)

MSAQQYIIPDLLANWPWQ RVSNSMLDEV RDEAN EWVMSLGLFEP AQFKKFRACDFN  
LLASFIGPLESKEHLRVACDLMNFYFAFDEYTDVASREEAMKIAQGVM DAFKTRSAEPS  
SSKITEMARQFFRRTVDVVGEDSPAINQFITDFD TYTTAVIQEADDRAEGTIRNVADYFT  
LRRETCGAKPSFSFFALGLNMPTEVF EHLIMSTVECATDLIAIVNDMHSYGLERARGL  
DGHNVVTSIMYEHQLDLQ GALYWL AGYAEDTIAKFFSEKERLPSWGRAVDLSVQE FV  
DRLGRCVRGYDAWSYETNRYYGNC G VQIRQTRRITLPGNDSGYITKKEMGV SIA

>Hfas94b (Genbank ID:MK287937.1)

MSYAPTVEELKQWEKGPNPELLFGNSFPLARDHPDWQKLEQENDQWVEENWQFDD  
KELREYLMSSKLGPFSSMCFPFGEREKL LWICRLVTLLFC LDEDLDRHVNHLHLLPILKAL  
TAGSRKPENNYAELAI DKCWRAIERTSTPSTFRQFVQITHEYFDSHGQIPYENFDQYVG  
ARRTNVGAYFMWACLRYAAGIDLTDEELAHPLIKRLEDIAGFHIAFTNDLISYTK EFLT  
DTATNNILTLLQRNDGLTPAEAEAKIRRELKKSEDDYQVAAKEVLNHPVLGKNKAIRK  
LVLNIPYGMGGNAWWSLITKRYNVDPVNHPLPQVKIHIDPSMPYHPDAVAFLDNGSK  
KALTTKGAKSFLSSWT VWF GALL

>Hfas255

This sequence is not available.

>Hfas344 (Genbank ID:MK287938.1)

MSQSQFTIPDLLASWPRAKNPALDQNL EDEANAWVASLELFEP RQLDKFKACQFNLL  
ASLVGPIEGRDSL RISC DLMNFYFAFDEYTDV VSGDEVMMIVADVIQAFRDRESPEGSSK  
IKEMARQFFQRTIALVGEDTQ GIDHFIADFEAYAKSVVQEADDRVQGIVRNVEEYFILR  
RDTCCGKPSFSFFGLGLCIPKEVFDHPVMQSLTESATDLIAMINDMHSYALEHARGLD  
GHNVITAIMHEHSVDLQGA FYWLSGHASKTVSKFLNDRKNLPSWGS DIDKAVNEYID  
RMARCVRGYDAWSYETNRYYGKNGLEVQKSRKIMLQHRELEMGYITRDQLIGAA

>Hypsu1\_138665 (JGI ID: Hypsu1\_138665)

MALSNSNSTTATVTLPD TLRFWPWQRHINPHYSACKKASSEWCESFKAFSPQAQRAF  
NKCDFNGCRIGCDLMNLFFIIDEHTDIASAETARTQANIIMEAIRDPEMPRSENEWVG  
GKAAQQFWLNATKSATPSAHRRFIDAFQMYMDAVVQQAADRSKNYVRDIDDYFVVR  
RDTIGAKPSFAICELYLNLPDSVMEHPVIMKLTEL CIDVIIIIGNDLCSYKVEHEHGDDGH  
NLITVVMNQFKITPQEAMNYISDLHDKLAVQFLDEWKNIPTFGGPLDLEV RTYCHGLG  
NWVRANDSWSFESERYFGKRGIEIQTTRQIEMNIQSHL

>Agr1 (JGI ID: MN146024)

MCASATRPQPSASNNVKKIILPDLVSHCTFKLRHNRHRKQVTTETKKWLFKDGNLLG  
QKERAYHGLKCGLLTSMCYPDAGYPQLRVVNDFLT YLFHLDNLSDEMDNRGTTTTAD  
EVLNSLYHPHTWRSSARVGKMTRDFYKRLVLTASPGAQQRFIETFDFFFQSVTQQALDR  
ASGVIPDLESYISLR RDTSGCKPCWAMIEYANNLDIPDEVMDHPIIRSLGEATNDLVTWS

NDIFSYSVEQSKGHTHNMIPVVMYQEGLDLQAAVDFVGDMMCRQSINRFVEEKARLPS  
WGPKIDQDVAIYVQGLADWIVGSLHWSFETERYFGKSGRQVKASRIVDLLPRQRLP

>Agr2 (JGI ID: MN146025)

MVWDFVLSLFHSLLAFAFQTLTSLTGSFLFNNKMAPAPNPAPVTFILPDLEKTFNSLPD  
DGLNPHHDVACAESREWFAKYNKKVLGAQMQUEFFRRCKFELITSYTPYPVDKEGLRA  
TMDWHNHLWFFDEVTDDETGTGKDAHKSIIITIRTLREPDFDDGSSLCRMVRDFRLSHLSR  
AGPECTRRFLEHCDVAFHAGAVEAELREKGEVLSIEGYLKLRRETSGARTCFDMAEYL  
MDIDL PQDMYDDPVFQKGYIAALDLIFLANDLYSYNMEQAKGHNGANVLTVMKET  
KLNLSAADYVGVLCCEKLIKQFQEAQSTLENRLAKEKNPAKAAALKDAIRSLVGYGH  
WVRGNVEWSFETERYFGKKNKEIKKSRVVTLTPTNSVNRALKA

>Agr3 (JGI ID: MN146026)

MNASPFLNESSPTRPTSFLVLPDLVSHCKFPLSYHPNGDEIAQESVDWLDSSCPDLTAKQ  
RRALRVLQSGELTAYCYNQATSPERLRVVSDFLTFLHLDNISDGMMTRETDLADV  
MNAFWFTDKYMPTRGPGKEQLDEELNPGKLARDFWSRAIADCGVGVQARFKETMG  
LFFEAVNIQARMRDEDTIPDLESYIDVRRDTSGCKPSWVLIEYALGIDLDPDHVVDHPIM  
QALNQGTNDLVTWSNDIFSYNVEQSRGDTNMMIVILMEYHGHTLQSAVDYVGELCA  
QTIDTFCENKERLPSWGPEIDDMVARYVKGLQDWIVGSLHWSFQTQRYFGKDGLDIK  
KHRFVKLLPLEAAK

>Agr4 (JGI ID: MN146027)

MSALPSQFKLPDLLSTCPLKDGTPAYKKAASRAWIGSYNMFADRKRAFFIQGQNE  
LLCSHVYCYAGYEQLRTTCDFVNLLFVVDVSDVDEQSGEDARATGQVFVNAMKYADW  
HDGSKLAKLTKDFRVRFLRLAGPKNVARFVALCESYTACVGKEAELRESGQVLGVKEFI  
PLRRQNSAVLLCFSLVEYILGIDLDDEVYRDENFLNAYWAACDHVCWANDVYSYDME  
QSKGLSNNNIVTVLMEENHTSLQDTSYIGEKCAEFVQIYLTSSKRLSPSLGPDAAALFLE  
SIGSWMVGNLAWSFETSRYFGSRHLEVKETGIVILRPRELPEDGSSSDSDEE

>Agr5 (JGI ID: MN146028)

MASSLLEPSLAALVILLASVSLSRKKRPAPEPQGLSVLGNLFDIPKRASSIYLALGKP  
YNTLTKRAVSQQLQGYTPGSHIDATSHSPRVFRLPNLEETFSVFPDHGLNPNTSARTDS  
RAWINQYTKVVC GPKMVAFMNNCEFELSNSHCYPYAGYKGLKATMDLTNWLWYDE  
YTDTGSGAEAVKAAGIVARALREPDYDDGTWVCRMMKSFKQNHIDKAGPGVARRFI  
DNFCNYVEVVGREAELREKNEVLDIPNYVTFRRETSAVRTCFDLVEYCLDLDPQYVH  
DDPVFISGYNAGMDLVFWANDLVSYNMEQSKGHSGANVVTVMKSKGVDLQTAVDF  
LGGYCEALTAQLLEAKRILQARSDAAYS RDVVR LMDAFGDWVRGNVAWSFETERYFG  
KENKRVKETLLVELKEPFVGALALKE

>Agr6 (JGI ID: MN146029)

MPGSANWTADRFYIPDTLANWPWPRAINPAYEECKAASAAWCEKYGAFSARAQKAF  
NLCDFNLLASLAYAGLPADVNRVGC DLMN LFFVVD EHTDAMDARSVQDWVDIVVD  
ALHHPHTPRPAGEPKVGEIARTFWENGICMGPTAQR RFVETFTTYLQSVVTQAQDR  
DKHLFRDVDSYMEVRRDTIGAKPSFALLEHDMELPDDVFYHPLLEKLREWAIDMLILG  
NDLCSYNVEQSRGDDGHNIIRLAMLQENTNVHGALRFVSKMHDDLAEKFLSNYQG  
MPSFTPQIDAWVTRYIDGLGNWVRANDSWSFESWRYFKGDVLRVQAERWVELLPAP  
KDELTPA

>Agr7 (JGI ID: MN146030)

MSFFKSSQPTIYIPDTLRNWPWPREINPHYEECKRESAAWVEKFGAFSAKAQKAFNKC

DFNLLASLAWSRVNRDGCGRIGCDLMNLFFVFDEWSDVSDAEETRRMADIIMDALYDP  
HKPRPTGEWVGGEVTRQYWLNAIRTATPSAQKRFIKAFKLYTDSVVQQSADRDKHLIR  
DIDSYFEVRRDTIGAKPSFAINEVHMNLPDYVMEHPVIKNLTAYCIDMLCIGNDLCSYN  
VEQSRGDDGHNLTIVMHQLNLDVQGAFDWIGKLHDELVDKFLEEYKNVPTFKDKQ  
VTKECAEYAFGLGNWVRGNDQWSFESERYFRKDGMRVLTERTTVLLPKKREPPPKPL  
DEDPIYSALPWWGWTALFGFLATAFTFSARQLSTRISANLIA

>Agr8 (JGI ID: MN146031)

MSEQQYTLPDLLQNWPNRHLSPYYEEAKRESSAWVESFKPFDQDQGQRAFDAYLLAS  
LTYSHGSREFVRLGCDLMNFYFVYDEYTDVSDSAVADRLANIVIDAMRNPENSSQSGD  
HLLGKMTKHFWRALAMAPAGSPCFEHFITTSETYLRAVTQEAEDRANKRVRKVDDY  
LRLRRDTCGARPTLALIEFGLNLPNEVVRHPSLVALTEAAVDLIILVNDMHSYVRELS  
GHENHNLITAIMLEHRLNRQDAFHWLGSCHSRVVDQFLSDLDELPSWGEPTDSGVRD  
YINGLGQWVRGNDWSTESKRYYGEDGETIRQERLVTTRSGESNYIKFGQVGVQDSVR  
IQPIEAN

>Agr9 (JGI ID: MN146032)

MTAAPLTFTLPDLLANFPWKRNLSYYPECKTESSAWTESFHPFDDEGLKGFNLCDFN  
LLASLAYSPREREIIRLGCDLMNIFYVFDEYTDIADGDGADKIRDIIMDAFRNPHKPRPE  
GELLVGEMARDFWIRASGYVSPDAHCLTHFLRDFDTYTAADVREADDRAKRVYRTFE  
DYLIRRDSSGCLPSFALCEFGDLPEEAYHHPRMAALREQSTDIAIGNDIDSYAMEKA  
RGLELHNSVELIINEHGLDVQGAINWLERYAAGVHASFLDNVANMPSWGEDVDRRV  
KMYIDGLAQWVRGNDWTFESGRYFGDKGLEVQKTRVMSLLPASKVSLRSRPKAVG  
HVPKKLLRYFRYSTMYFFGFHVLAK

>Agr10 (JGI ID: MN146033)

MSLNFFLRRYTVFPWSRKLQYYHDAKRESSAWTESFHPFDEDL  
SKAALTFCITALLASLAYFLRQKEIVRLGCDLMNIFYVFDECADIADKEGASQIRDVVM  
DDLHRPEKTCPGGEILPGEMVKYVLLCPEIPETYINTKSFGFAPQSSSPQPHIVCATLS  
RISMPTQQQWFNVKRTIGPNVFLARSATVLPYAETHTFYHPRMIALREQAPFLDINSYP  
MKVRGLVQGSINWLEGYAAGVQAAAFLDNIANLPSCAKEVESRVNIYVNELAQWAR  
GNDDWTFESGRYFGDRGPENQSDIPTSSNR

>Agr11 (JGI ID: MN146034)

MQIILPDILQTWAYARLLNPHYDGAKLESSLWIHPLVAKLFDQK  
GQKAFQNDYTSLLASLMYSHQGVPSRRCDMMNLFVYDEYTDVVSPEIAHRLSKIV  
VDAMKNSDEMSPCGEHPIGDKAKEFWRLATTLLPATGSNSDVCKSRFINLTEEYLN  
TVEARDRNEGTHSVKEYLTMRRATSGAGLMLALIEFELDPKAVLEHKFVQALEEITY  
RTVSSGQANHNLTIVVMHENPGLSLQGAFDWLGSYAAGVVECFQTNVRNLPSFCDVE  
GPACESVDGTLQERVDKYISGLGQAVRAEDDWAFETTRYYGEDGPKVRETRVLVIRPV  
KRITRRHLLQSLEIKYSMVRG

>Pro1 (JGI ID: AGR34199)

MSQRIFLPDTLANWQWPRHLNPHYAEVKKASA AWAKSFRAFQTKAQEAFDRCDFNL  
LASFAYPLADEARLRSGCDLMNLFFVIDEYSDVSTEEVRAQKDIVMDAIRNTEKPRPA  
GEWIGGEVSRQFWDLAKKTASTQAQKRFDTFDEYLESVVQQAADRNNSHVRGIESYL  
EVRRTIGAKPSFALLEFDMQLPDEVINHPVIKELEKSCIDMLCLGNDVVSYNLEQAR  
DDDGHNIVTIAMNELRTDVAGAMIWVDEYHKQLESRFMENFKKVPRWGGPIDLQVA  
RYCDGLGNWVRANDQWSFESERYFGKKGPEIIQRRWITLMPKMVSEELGPQIVDGFH



L

>Galma\_104215 (JGI ID: Galma\_104215)

MNTTTRTFYLPRLDTFSVFPDNLNPHYAECRIQSQAWIDKYYKIVCGPKMRAYMD  
HCKFELITAYTYPYASSDGLRKTMDLANILWLYDEFTDTLSGKDATNAAAIIVRTLRE  
FDDGSWICHMMRDFYAAHIEKFGNVSRRFIDHFCQYVEGTGTEAKHREKDHVLDIN  
AYIIMRRAASAVLTAFDLAEYCLGIDL PQYVHDDPAFISGYNAGLDLVFLDNDLFSYDM  
EQAKGHCTTNITVVMKSKRIDLQSAFDFTAGYCESLTQQLIAAQISLASRTDPVFSNN  
AVKCLEAIANWVKGSDGWSFATERYFGKQNVIVKETRAVEMRKSQDI AVLKE

>Omp1(JGI ID: 1311)

MANPYAVWNAGQSGTWHGQAVNFDPPPSIFGALPFVSRVEEFPALTFSFTAYNPSILNC  
IVLGPNNSPQFRVVTDPAMPGYTLLKTMDERSSALVEWQQPPKIEIRGAVLKQPTSNFL  
RLSPNRRYRIMVIGDQEFMWLPDQSSVCVSLSTFDAMPLARISRNGNSISLEVTQTAIRA  
GLLNTCVVTTVLLQCGRSID

>Omp3(JGI ID: 4636)

MAIENTIASAPASTPAKQLDTPDHFILPDLVSHCTFPLVYHSNGDAVAAQSVKWLDTN  
CPDLNDKRRKALYGLQAGELTAYCYNTAPDQRLRVVSDFMNYLFHLDNISDGMMTK  
DTDALSDAVMNALWFTEWYRPTTKSDYVQPD EELNAGKLARDFWHRCIQDAGPGC  
QARFKETLELFFEAVNIQAKARDAGVIPDLESYIDVRRDTSGCKPCWALIEYGLGIDLPD  
YVAEDPIIKSLNQSTNDLVTWSNDIFSYNVEQSRGDTHNMIVILMLYHGHNLQSAIDYV  
GDLCRQTIDDFKENRKIPSWGPEVDDIVKQYVQGLQDWIVGSLHWSFMTRYFGKQ  
GQEVKKNRYVKLLPVGEEANKW

>Omp4(JGI ID: 1447)

MYIFCSQVVSGLNKFTEFKMSSAPTRFLLPDLLSACPLKGSVNPYYKEAGAESSAWINSY  
DIFTDRKRAFFVQGCNELLVAHTYPYAGYEEFRTCCDFINLVFLDEVSDEQSGSDARF  
TGEVFLNALRNPENDDTSKLSKISKEFRARYFKRAGPRTAERFLQHCQDYIDCVTREAE  
LRERGEVLDLPSFTALRRENSAIRICFLFEYALGFDLPQEVFDDPTFMEYWAAADLV  
CWANDVYSYNKEQAQGHGGNNIVTVLMKAKDLDLQAACDYIGVYCEELMGRYLSA  
KARLPSWGPEVDAAVAQYVEASGHWVRGNLDWSFETQRYFGAQHAEIKETRLVTLTP  
AIPEDFSDTGSESE

>Omp5a(JGI ID: 2392)

MSPDPTRIVLPDFLAACPFE SSTKNPHLKAAGAESSAWVNSHVVFNDRKRAAFMQDI  
YELLVAYAFPWADYEDFRTMCDFINLLFVLDELSDDQNGKDAGYTGKLFMDAMRNID  
NGDTSELTELCREFKARYSKRVSPQVNERFLQHLQSYTDCVAQEADLRERGEILDLESY  
VALRRENSAIRPCFDLVEYIIDFDIPQEVIDHPVFSEMYWASVDLVCWSNDVYSYNVEQ  
AKGHGGSNVVTVLMKEKNLDLQAACDYVG VYYEELMDRYLSAKARLPSWGPEIDA  
AVGKYILAEAQFVRGNLDWSFDSPRYFGPQHDQVKKTGIVTLTPAPKKFGSDSGSESE

>Omp5b(JGI ID: 2393)

MSPAPSRIVLPDFFASCPFESSTINPHFKAAGAESSAWVNSHVVFNDRKRAALMQNSY  
ELLVAYAFPWASYEDFRTLCDFINLLFVFDEVSDDQNGKDAGYTSKIFMDAMRNIDNG  
DHSELLCKEFKARFSRRLSPQVNERFLQHLQSYTDCVAQEADLRERGEILDLESYVILRR  
ENSAVRPCFDLVEYIMDFDIPQEVLDHPVFSEMYWASVDLVCWSNDVYSYNVEQAKG  
HRGSNVVTVLMNEKNLDLQAACDYVG VYYYQELMDRYLSAKARLPSWGPEIDAAVG  
KYVLAEAQFVRGNLDWSFDTPRYFGPQRDQIKKSRIVTLTPAPKKFGSDSGSESE

>Omp6(JGI ID: 4774)

MIAKNSEIDRFYIPDTLANWPWPRHLNPAYPEAKKASAAWLRSFNAFNERSQKAFDL  
CDFNLLASLAFPLADLYCLRSGCDLMNCFIFDEYSDVADPQTVRQQADIIMDAIRNP  
HVPRPRGEFIGGEAHRQFWERAMQGATPTAQRRFIDTYQQYTDVVQQATDRADNH  
IRDVEGYFTVRRDTIGAKPSFTLLEFTMDIPDEVMGHPVIKDLSLWCIDMLIIGNDLCSY  
NVEQAHGDDLHNLVTIVMNQYNLDLPGAMEWIGKFHDDIADKFLDTFAKLPSWGPE  
IDPQIRRYVDGLGNWVRGNDSWSFESWRYFRGKGPEIEKTRWVDLMPTEEATITPKYE  
SDSNA

>Omp7(JGI ID: 2271)

MPETFYLPDCLANWKWKRALNPNYPEVKAASSEWLRSFKAFFPKAQEAYDRCDFNL  
LASLAYPLADKDGRLTGCDLMNMFFVFDEYSDVAHESEVQVQADIIMDALRNPHKPR  
PVGEWVGGEVTRQFWELAIKTASPQSQRFIETFDITYTKSVVQQAADRTQHYVRTVDE  
YLEVRRDTIGAKPSFAILELTMDIPDEVIHHPTIERLAILAIDMILLGNDTASNYEQARG  
DDNHNMVTIVMHQYKTDIQGALSWIEKYHKELEEEFMQLYNSLPKWGGQIDVDIAR  
YVDGLGNWVRASDQWGFESERYFGTKAPEIQKTRWVTLMPKKRAEGVGPEIVDISEL

>Omp8

MKGEPQEDLFLDALARILLDAPRYYGRLATNIIVTATLDFFTGLFLELQARDMTFNEDL  
HNFAVFCRNLTGIAHAYAVFMFPRDVPFTVYVRSLELKTIDINYVNDIMSFYKDRAEET  
DNLASILRQVHPSMTKHQVLQKIVDDAVEADVRARKILADYQPALDAYEHFRKGYAM  
FHVSSGRYRLDELFSYIRFE

>Omp9(JGI ID: 3258)

MSQILHLLWSKFSTSLPSTVTIGSDPQTLQLVHSPAPNVNANALEIYKIVDNFLSRCGIRL  
ESTPLDVEFYNECKKTLLSHYIGIHDSDKVSESWFKRYLSVGVITTNAYGHLDNKLTKI  
YIALYTALATCFDDVFEKNVDHMSGFNERFMKALPQGDVFLDAFAKVLLDAPRYFGR  
LASNIIVTSTLDFITSMSVDVLTGKMKFNQNLHNFAMACRNMSGIAYTYAPFIFPKEVP  
FAIYAQCLPDMRIYINHVNDVLSFYKEDKAGETENLASILGQVHPSMTKYQIVQGLAD  
DAAEADLRVRTVLSQYQPALDAYNCFRQGYVSFHASSGRYRLDELFSFVEPEPIV

>Omp10(JGI ID: 3981)

MRNFLSQCQIPLQRGVPLDPTFHQECANVLIEDYLKPSAAVTLENLPMLSSFNPFLLTL  
GVRMASTGYAHLTHTPTRVYVALFTALLVCLDDIFPENVELMCGFNERFIKNETQGEPI  
LDAVAGLLRSTSKYFMSLSSNLIVTSALNYVTSLSDQGLHSIKATEHSRNFARLCRNMS  
GIPEAFAAFVFPPEVPFTAYIQCFPDLYTYANYVNDVLSFYKEDIAGETENLVSILAQTQP  
NSSRYQVLQQLADEAAAANANIRDILSDQKSILDAYDAFRVGVFVQFHIDSPRYRLAELF  
PCIDG

>GME9210(Genbank ID:KX281945.1)

MPLSSSVVAFRLPDTLGCWPWRRCLNTHYVEAKQDSASWLESFHPFGPKAQRAFNKC  
DFTNCVQGVTTSSSSSTLMSRTRRRSSSRTSSWTHCETLTSLVLQENLSWAKSLGSW  
ARTIKVASEPSQRRFIETFDYQCQSVVQQAADRSQNHRLRDVESYLENRRENIGAKPSFA  
LLELDMNLPDEVIEHPTIVNLTTWAIDMIILGNHCLVQRGAGAWRRRTQRRDHRHAS  
LQRRRAGCHGPHRRVAPEAGGPVPHQLQQAADVGTDRASAVHPGHRKLGTRERR  
MEFREREVLWIERTRDRAESLGNPTPSGLRGEACGC

>GME3634(Genbank ID: KX281943.1)

MAVTPANVASPDSQEIVLKFPDFISIPYPLRCHVQEREVSRQSEEWLLSMANFSEKQRS  
KFLTLNGGLLSGMCYIDCTFDELRVCTDFMNFLLTDDWTDEFDTTGTRGLAECVMN  
TLYWPHSYQADTAAHRLTKSFWVRMKQTAGPGCQQRLMSTLDITYFQAIMQQAADR

GSHNIPELEEYILLRRDTSGCKIGFAFIEYAANIDLPPDDVIEHPPIKAMADATNDLVS  
WANCPCFVQRTVTRRHAQPRLC SHGSEPRPAGCDRAGGRAMGEDPPLVLRVPQERPFV  
GLRDRPCRRSVHPGARRLDYRERRVELRDGALLWQGRASREEDAAGYTASGPYSC  
>GME3638(Genbank ID: KX281944.1)

MRARSFILPDLVSDCPYTLRCNSNCEAVARASEAWMLEDANLSPKRRDAFLRLRGGEL  
TAACYPDTDEACLRVAADFLNFLFLSLDDWSDEFMEDTCGLAQCVMCVLHDPDDFQ  
TEKAAGKLAKLFQSVPADGGAEVYSSIHRYGPLLSCDCTASPGPRVRVCSLTRRICGPPR  
GHERVQALLRSHRIRRGYGPSRPRRPSSNNHRPRAGSQRVYIMVERSLLVQRRASAGH  
TQHDCGDHARGRAQLARSRLGRSLQALHSALRGKPSHAAIVGSGD\*RGSRQVCARP  
PGLDGRCPPELRLHRTLFRGRPCDQEARCRDTTTAEVFI  
>Cun3817

MVMYKRNATFNDGPVTQIQDIPSISSLFFTMVNLQRPFPSPRFVLRDLTAVTEPVFKLRTN  
PHQEEAYRNIERWFKDLKVYPEPKQRKELSHAEDLYAGLSFPDADVEHLETCIAFFLWA  
FSFDDLSDGEFQSKPDRVQVGVDISMEVLNHPPEPPKFKYAAMLHVDWRRFRSTAS  
PGACDRFKAVESWMKSQVEQAANRSWNTVPSVDEFILLRRRTIGGEIVEAMVEYSLDI  
KIPEYVWDHPVLVGLSRAAIDIMIWNDLCSFNKEQADNDFQNLVFCVMLERNVDLQS  
ALDIVTKMLATRVDDYAKFKAQLPSEGAEVDQELAAYEKALEHYVQGTWVYYESPRY  
FRGMDVTDKTDMPVYVSRADAPTSPSVSTRVSYLSNRSMPPRSSKASV  
>Cun5155

MANESLTTTQLFIPDVLRSWPWPRQINPHYAICKAESDTWAQSFNAFSMKAQQAFLR  
CDFDLLASLGCPRLDKEGCRICCDLMQLFFIFDEHSDIVDTTVVRRQADSIMAAIRDPT  
RPREGEWIGGEISRQETANAMRVSTPTFQERFIVAFQEYTDVSVVQQALDRDRHNIPNIE  
QYFNYYRDTIGVKPSVAMLEIQFDIPNEVSNNHPAISTLRSTCVDMIAINDLFSYNVEQAL  
GDDEHNLTTVMMHEHECSLTDALWISDLHDSIANTFLSVMKTVPSFGDLVIDEQVAI  
YVDGLGNNVRANEANSFESERYFGKNGLEIQESRVVDLLPKQEN  
>Cun3157

MSSNAVSTFLPDLLAICPLQGRTNPHYEAAAESSANVLSENVFSNRKQDFFVSGGSEL  
LC SHAYPYAGHEELRICCDEVNLLFTYDEISDEQNGQDAYKIGLVLLKSLRDPEYNDGS  
VLCTMTKQFQERLFPRMGPCYERFVDHVENYINAFVKHAEYREKNVLDMASYEIL  
RRLNSAVRCCFGLFGYVLGLDLPDEIFEHPDMMAMHLAAVDMVCWNDIYSYNMEQ  
AMGHTTNIMTVLMKAKNVDLQGAADYVGEYFKVLMDRFFDHKSKLPFFGPDMDP  
TAEQFVMAMESWIVGNLANSFETLRYFGKREQVKVTLVVELASKKV  
>Cun3158

MPALTRTFKLPDLLSMCPVKGSTNPHYEAAAESSANINSYNLETDQKRAFFIQGSNEL  
LVSHITYPYADYEQERICCDEVNLLFVYDEVSDDQSGRDARATGNVFLQVMRHDDWD  
NGSPLAQMTKEFKARFRKFAGPGCYARFLVHCENYINAVGHEAEYRERGVLDMESY  
ETLRLRLNSAIRLCFGLFEFVLGVLDLPDEVFDDPAFLNLYNAAADMVCWNDVYSYNME  
QAKGHSGNNILTVLMQAKNIDLQTASDLVGDHFAELMRRFLEGKRALPSNGLATDTA  
VAAYVKALEHNVKGNLVNSFETQRYFGPKHEEIKTLLVVLRAPSFD  
>Cun0773

MVAHTFSLPDDFAKTPYQSRLHPLTGIVVQKSQEWVLRKVNYDEKERTAFLKTSGGLL  
CGYCYPNADAFHIQVCADRMDWVFCLDDWSDECSVAEAQSVINSIKEYPRYPHEHSG  
STPIIELAKNLYDRFFQTAAPGCAERFVRSMDIYLDGVVEQADCREKGSILDTESYTILRR  
KTSGVWPCFALIEFAARIDLPDAVVEHPLIRSMEEATNDWISWINDILSYSKEQADKDA

HNLIIVIMNQYTLDLQSAVDLAGSHCFDCITKFEDNRKALPSWGEEIDREVDLYVQGL  
QDWIIGSLHWSFACRRYFGAEGKEIKEHRTVFLSEKHQS

>Cun7050

MQSATAPVLSSQPSKVVIPDLVSHCDFTLRCNSNQERASAECKEWLFQGSNLSERKQN  
AEHGLKAGLLTSWCYPDAEYHHLRVCCDEVNWLFHLDNISDDMNTENGTSRTAVDI  
MNTLYHPYSYSPVSPEGKLIQDFWRRLIPTASPGSQQRFNRTMDFFFQAVTQQALDRA  
NGVVPDLDSYIALRRDTSGCKPCWALIEFAYNLDLPNEVMEHPTIVALGEATNDLVTW  
NDIFSYNVEQSKGDTHNMIVVMMRQEGLDLQSAVDFVGDLCCKQSIDRFIEQRAHLPS  
WGPDIDQQVEKYVGGLADWIVGSLHWSFESERYFGKSGLDVKKTRVVLLPRA

>Cun0716

MSRFNADSFVLPDLVSHCTYPLNLNTNWHSVSRASEQEVLEEANFSEMKRGVFMGLK  
AGELTSACYPYCDAFHLQVAADFLGYLFTLDDWSDDFDELGTKGLAVCVMNALRDP  
HGFQTDKPAIGLAKDFFSRYISKGGPGCIERFIDTMDLFFIAVERQAIDRENGVVPELEA  
YIPTRRDTSGCKPCFALIEFAADIDLPEVVEHPTIAALEEATNDLITWNDIFSFNVEQSR  
GDTHNMIIIVAMRERGLDLQDAVDFVGELCKQSIDRFEHDLTVPSWGPEIDRDVRTYI  
QGLQDWIVGSLHNWSFDTRYFGQDGTVEVKLHRQIKLLPRKGPCSD

>Cun0759

MARSTEALPDLVSHCPYPLRINPLCDIVTQKSEEWILNEAKYTPEKRIRFLNTKAGILTA  
YCYPDADDFHLQVSSDYLTWLFCDWSEDEFDETDAACSFADCIMGCLRDPYGFKTDK  
AAGRLTKSYFGRYLQTSQPRCAERFIDTMDLYLKSVAQQAADRDDGRTPDLETYIGLR  
RDTSACRPFALMEFVAGIDLPEVAEHPLIRSMEDATNDLVSWNDIFSYNKEQSRGDT  
HNLVAVIMEERKLDLQSAMDFAGELCHQSISKFEADRRSLPSNGKEIDRDVQLYVQGL  
QDWIVGSLHWSFATKRYFGTEGEAVKHHRTIQLLPRKDGVPEPKDTVVRQNVIVYLFN  
MFFTVLVGSFLGNMKEGLSSPLRVPRP

>Cun3574

MSPKRFPDLVSHCPYQLRIHPDCDTVNKTSEEWIMKDITFTPDLRKRFLDIKAGVLT  
AYCYCDADLFRLQASSDYLTWLFYDDWTDEFDEDESCSFKDCILGCLRDPYGYKTDK  
IAGRLIADFFRRELQTSQPHCAQRFIDTMDLYLDSVGRQAADRIEERTPDLESYIALRRD  
TSACKTCFALMEFANGLDLPDEVSEHPLIREMEDATNDLVSWNDIFSNDKEILIEDTHN  
IVAVIMEDKKLNLQSAVDYAGDLCNNCIARFDEARKQLPSWGPEIDREVQLYGQGLQ  
DWIVGSLHWSFVSKRYFGLEGEAIKKHRTIELTPAMKSDVEA

>Cun5765

no function

>Cun6114

no function

>Cun7487

no function

>Cun0802

no function

>Cun9106

no function

>PpSTS01(JGI ID: Posp1\_60326)

MSSAPSTSAPTIVIPDLVSHCTIPVRCNRHWKQASVESKRWLFRGGNLSDRKRDAFH  
GLKAGYLTSMCYPLAGYPQLRVSCDFMNYLFHLDNISDEMNDRGTHGTAVSVLDALY

QPHMHPTSRVGKMTKDYWVRLIQTASPGAQQRFIETFDMMFFQAVTQQAMDRANGVI  
PDLESYIAIRRDTS GCKPCWALIEYANNLDLPWEIMDHPIIRGLGEAANDLVTWSNDIF  
SYNVEQSKGDTHNMIVVVQNQQGLDLQSAVNFGDLCKQSIDRFHYLRENLP SWGP  
ELDREVEIYVDGLADWITGSLKWSFESERYFGKAGLEVKKTRV VALLPRRA

>PpSTS03(JGI ID: Posp11\_99496)

MGSISSTPSQKSPVFPTPSLLPSDIVAVRPEGDEAKVLKFPDLVKSIPFPLRLNPNYIRFVSAE  
SDAFIIEYANFSEKQRNRFIGLNAGLLCGMCYAECGPEQLRVCCDFMSFLFNLD DWS  
EFDTAGTKGLEEAVMNTLYHPDTYVSDTVAARTARSWWTRMLKTVGPRCRQRFVETL  
GFYFKAILQQAADRSSKTIPDLETYISLRRDTS GCKTG FALIEYAAGIDL PNEVVDHPHIIQ  
SLLDATNDCVSWANDILSYNREQSRGDTHNLVPVIMQTVGIDRQA AIDYAGDLCNK S  
VAHFLEGKAALPSWGKEVDVQVEQYVQGLEDWIIANA EWSFMTERYFGKDGP KIRK  
GLQVSLLPVVGFD

>PpSTS06(JGI ID: Posp11\_45581)

MTVIADTSRCFILPDLISYCQFPLRCNPHRDAAQSSTSWLINNYPGMSPEQLVEVRRLD  
ADTLASYCYPDCDVERLRVASDFLAILFHLDDITDTMEEGGTEQLEGTIMDAFRSEGKL  
DQREDEPRVRVPAKDLWTRFIRNAKPCVQTRLRDNIALFFKTAREEARDRERGVLLDL  
ESYINMRRGTSACLSCFALTEYSIGIELPQYVVD DPIVQALNQSANDLVSWSNDIYSFNN  
EQAHGHIHNMIVILMKSQGLGMQDAIDYVSDLFKQTIDGFMENTQLLP SWGA AVDAD  
VRLYVQGLQDWVVGNLHWSFATERYFGKRGAEIKATRVVELLPKKPV S

>PpSTS08(JGI ID: Posp11\_59374)

MLYLPDTMSAWPWQRAINPYFNEVKAASNSWFKSFRAFSPASQKAFDKCDFCLLAAL  
AYPRARKEHLRTGCDLMNLFFVIDEYTDVEDANVCRDMVDIVIDALRRPHDPRPEGE  
VVLGEIARQFWARAIETASPTSQRRFLETFIAYLESVVLQAADRDCDAEHTVQTYLAQR  
RDNIGSYPSYAVLELALDIPDDIFYHPAMNELSLYATEMLIIDNDLVSYNREQASGDTNN  
ILFVIMRQFNCSLDHAMAWAAAYHSQLEARFMDAFKRMP SWGLEIDSQVEEYCQGIA  
NWPRGND CWSFESGRYFGDKGREVQKTRCVPLLPKKERDTS LRQQDVVITSL

>PpSTS10(JGI ID: Posp11\_98072)

MPSTPRQFVL PDLFPLVPFKGSTNPHYVKA AESSAWINSYNVFTDRKRAFFIQGSNEL  
LVSH TYPYAGYEQFRTCCDFVNLLFV VDEV SDEQNGKDARHTGNVYLKAMRDPEWN  
DGSVLAKMTKEFRARLLQYAGPGCYARFLKH CEDYVEAVAKEAEYRECGVVLDMASF  
ETLRRENSAIRLCFGLFEYCLGVDLPEYVFEDPTFM TLYWAAADMVCWSNDVYSY NM  
EQAKGIGGNNIVTVLMQAKGIDVQAACDAVGEHCKLLMERYLDAKEKLPSWG PSVD  
DAVAGYVQAMEHWIIGNLEWSFETQRYFGAVHAEVKATRVVMLRPREIDED

>PpSTS14(JGI ID: Posp11\_101549)

MSDQPKMIYLPETMANWPWPRIYNPHYEEVKAESDAWFKGFKPFTKQSQVAFDKCD  
FGRLASLAYPWASKEHLRTGCDLMNVFFMIDEYTDVECASVVRGMVDIVIDVINNPH  
KPRPEGESLLGEITRQFWERA IKAATPSSQKH FIEAFTDY LNSVVEQAADRDN NHIRT V  
DSYLKTRRENIGARPSYFPAELGLNLPDEAFYHPVVT ELSYNIAELIILDNDIASYNKEQ  
ATGDDRHNILTIVMLQFNIDLEAAMTWVASYHKDVENKFLDGMKKLP SFGPVVDKEL  
EEYILALAIWPRTNDCWNFESGRYFGSKGLQVQKTRYVPLLPKV KTDPTLKQKQV VVS  
LVDL

>Fompi1(JGI ID: 84944)

MSRRYQTSRFSPSAKGKTSLYTSPGDLRALFHRFSLYAGVQLESFTSPKMMQIEVPV ML  
NLKESSMPMNSTVLEDCTAAVAKDAIVQFLRRLGAVLRPSFGNNRDLEERVKEITKTW

PFEHRIHPHITTGVVMANTTIAYLSDLDARAAVAAYTALITALDDPDIFHASGAQNFAQ  
MLCDGSALRDDGVLGQMARVLADMGNHFPPFGTSAIIAATLRWCNGELISNPANPFC  
LRPLSKAFADYQRGLTGVPEAYAAFVGWCKADFPVETDYIHVFPDICFFLNHTNDILSFY  
KETLDGESDSYIHARARLTGKSVTDTLYEVMDEVITTTTERIRKHFGEGRMRNAWDRIE  
AGYVWFHTGNPRYRLHELVDTEYMPMY

>GL26009

MAVTPASANASDSTKEIILKFPDFITPIPYPLRCHVQERQVSRESEEWLLSMANFSEQQR  
AKFLTLNAGLLSGWCYIDCTFDELRVCTDFMNFLFTLDDWTDEFDTTGTRGLAECVM  
NTLYFPDITYQSDTAAYRLTKSFWDRMRATAGPGCQQRLMSTLDITYFQAIMQQASDRG  
SRNIPDLEEYILLRRDTSGCKTGFTFIEYAANIDLPEVVEHPIIKAMSDSTNDLVSWAN  
DVLSYNAEQSRGDTHNLVCLMHQNNVDRQEAIEQAGALWEKTLNWFECRKAVP  
SWGPEVDRAVAMYIQGLDDWIIANAIEWSFETERYFGKEGHTVKKTRQIALLPQRAHA

>GIST56 (Genbank ID: UDP19923)

MSVEQLRPFPTHFRLKDLAAISGRVFEFKLNPHEKEAAKATYAWFDGRNVYHGLKKK  
RFLSHRFDYAGMSFPDADVSHLETICIAFFLWAFSFDLSDGALQSKPEAHQVGVDIS  
MEVLRNPTAPPPNFPYAAMLHDIWRRFRETASPGACNRFFRAVESWMNSQVEQARN  
RATDEIPSVVEFIILRRRTIGGPIVEAMVEYSLDLQIPEHVWDHPILQEMSKAVIDIMTWP  
NDLCSFNKEQADGDFQNLVFCIMIERDCDLQTAVDVLTEMLSQRVVDYERYRAQLPSF  
GPEVDAELARYNKAMEQYTQGTVVWYHSPRYFRGQEVGTIPEIVVPVYERTTPAPEE  
PTAPASKSARSAPANLAPSSSKEVGLLVNAPTQHNRSLLSLVACLCLCASFISFPSFPL  
NPRLVLSI

>GS14272 (Genbank ID: PIL24516)

MAIAASKPKPTPDHFVLPDLVSHCNFPLAYHPHGDDIAAESVRWLDEGCPELSPRGRK  
ALYGLQAGELTATERLRVVSDFMNYLFHLDNISDGMMMRKGTEELADSVMNALWFPD  
RYMPTACDGKEQPADEVSAKGLARDYWTRCTRDAKPGPQARFKENLELFFEAVYQQ  
ARDRDTKLIPDLDSYISVRRDTSGCKPVFDLIEYAMDIDLPEHVVRHPVIQALNQGAN  
LVTDIFSYNVEQARGDTHNMIVILMELRGFDLQTSVDFVGELCRQTIDTFMENQQNV  
SFGPRLDRDVALYIQGLQDWIVGSLHWSFMTERYFGKSGAEVKKHRI

>GS11330

MLATLSPFASGVHYPVVPITEETKDPLAAVKVLIRDFLDRSDYRSPGSPCDQELRRKLT  
ELSAWPSDIKPTLVAKIMDGSCVYAETTYAHTTHEHRYFIALYTACLMYVDDLGERNLD  
AVKRFTSRFAKGEHQPDPIQLRLAELLGRAHDLWTQFGADAIAGTLDAVTAMYIEFTT  
QGMVVKPSATRFPPYLRTRAGLGPPYIHVFMNDWRATPESYLQVLPSVVHSDIGADS  
LLWRLSFYKEELAGETNNYVHLRTSAEQSSAANVLRHLVEEVLESAGTMDMLTSGDSE  
LAALWQRYMQGYLEFSLKAKLQSGDA

>GS02363(Genbank ID: PIL35634)

MAVTPASANTQDSTKEIILNFPDFISPIPYPLRCHPQEREVSRESEEWLLSMANFSEQQR  
AKFLTLNAGLLSGWCYIDCTFDELRVCTDFMNFLFTLDDWTDEFDTTGTRGLAECVM  
NTLYFPETYSSDTAAYRLTKSFWERMNRATAGPGCQQRLMSTLDITYFQAIMQQASDRGS  
RNIPDLEEYILLRRDTSGCKTGFAFIEYAANIDLPEVIEHPIIKAMSDSTNDLVSWAN  
VLSYNAEQSRGDTHNLVCLMNQNGVDRQEAIEQAGALWEKTLNWFECRKAVPS  
WGAEVDRAVALYIQGLDDWIIANAIEWSFETERYFGKEGHTVKKTRQVALLPQRRA

>GsST543(Genbank ID: PIL26225)

MSVEQLRPFPTHFRLKDLAAISGRVFEFKLNPHEREAAEATHAWFDSRNVYHGLKKK

RFLSHRFDSYAGMSFPDADVSHLETCIAFFLWAFSFDDLSDGALQSKPEAHQVGVDIS  
MEVLRNPDAPPPNFPYAAMLHDIWRRFRATASPGACNRFFHAVESWMNSQVEQARN  
RATDEIPSVEEFIILRRRTIGGPIVEAMVEYSLDLHIPEQVWDHPVLQEMSKAVIDIMTW  
PNDLCSFNKEQADGDFQNLVFCIMIERDCDLQTAVDVLTEMLSQRVIDYERHRAQLPS  
FGPEVDAELARYNKAIEQYTQGTVVWYYHSPRYFRGQEVTGIPEIVVPVYERTTPAPEE  
PTPSASKSARSAPANVSPSLSKQAGLFVNTPVQHNARLSLLLVLVACLLCASFVSFSPF  
PLNPRLVLS

>GsST545a(Genbank ID: UDP19925)

MSIEQLHPLPSHFRLKDLAAITGRVFELRLNPQEREAATAAHAWFDSHHVYQDLNKH  
RFISHAFDSYAGMAFPDADVSHLETCITFFLWAFSFDDLSDGTFQSNPQAHQAQAVDIS  
MKVLRNPAAPPPDFPFAAMLHDIWSRFRATASSGACNRPVHFYRLFLLLILNHISRFFR  
AVEGWMRSQVEQIRNRAIDEIPSVNDFIILRRQTIGGPIVESMIEYSLDLRIPEDVWDHPI  
LQDMSNALIDLMTWPNDLCSFNKEQADGDFQNLVFCIMIEQDCPLQTAVDILTDMLS  
QRLVDYEELKAQLPSFGPEVDAELTRYIKAIEHYTQGTVVWYYSSPRYFRGQAVSGIPEI  
VVPVYEKSASMQDITLTPTAKASKPAPVVKHSPWVKADSSFVHTHVVLQCMYIYLLVL  
VAFVVVVLVSVNKITFMI

>GsST545b(Genbank ID: UDP19925)

MSIEQLHPLPSHFRLKDLAAITGRVFELRLNPQEREAATAAHAWFDSHHVYQDLNKH  
RFISHAFDSYAGMAFPDADVSHLETCITFFLWAFSFDDLSDGTFQSNPQAHQAQAVDIS  
MKVLRNPAAPPPDFPFAAMLHDIWSRFRATASSGACNRFFRAVEGWMRSQVEQIRNR  
AIDEIPSVNDFIILRRQTIGGPIVESMIEYSLDLRIPEDVWDHPILQDMSNALIDLMTWPNDL  
CSFNKEQADGDFQNLVFCIMIEQDCPLQTAVDILTDMLSQRLVDYEELKAQLPSFGP  
EVDALTRYIKAIEHYTQGTVVWYYSSPRYFRGQAVSGIPEIVVPVYEKSASMQDITLTPT  
TAKASKPAPVVKHSPWVKADSSFVHTHVVLQCMYIYLLVLVAFVVVVLVSVNKITFMI

>A8411

MSSTKIGKVAPFPPLPGQPWPPARNHPRWKELYRLHDEWLMKHWPFSSSEKKRARIPF  
MNLAGFSTWCAPASDFDRMVWGGRIAGIFFLADDYIDSGKMLDRIPGFKKAATGEGP  
LHPEDRAEICHDIVFRAIKETSHPRTRQLTQCTHEWWDNSNIHEPFRNLDQYLATRRV  
NIAMYFANAYFRYCLDINLTDEQVNHPLMREAEGIVSDHVGLTNDLFSYAKEYLTSQSD  
DTNVLRLMLQDFEGLTYEQAKDVTTKIRQKEQDFIPAGLAVLNDPELGKDPVHRWI  
ANLPYCMGGNNAWSQESGRYNIGDVP GAPPFSLSFEAEATPEDEVDDTEESALRD  
AVFNVEVIPEPDTLDIDAIESKGVRTKTQASIPPSLQLMNIPQSRVQHVGVRAIASSQR  
TGSDDNSLILKAVASLVRSYEIDVQTVGKVMYIYLNNSNIPVHAADLVHLLSQSEIEVNIS  
NGDSSALLLDAITHVESNTWDARNVITVAVTKQSVVTMLVGNAPIVMEPVVRGVFTD  
NHTQKLFPSYFTALQKSYESYLKRLRVSLSKEIDLNEATGAASVFDYMLTDHPEKLAEL  
LFRVSPCLSKDDNALPMHPRDFQKKVVFNGPDNGSIYDGLVCLVDAPSYEFFEKRIAI  
FSESNNGTSTFFCLRAVSDTKYMRDTLKA VGGVPRRT

>ShST51

MESVREHIPRLQHFLGEIGYRHTTPAPTLDLHAHHHHWIHHVLGPMTSWTVAKLNA  
LEDSSSTIFERAYPLSDAEMKFVLA KLTAIAIFLDDSLDEETYDDIGNFAHRVYLGEAQP  
TGVLTLYHQGIQELSKMHEGDAVFRGLAVAPWITFIDACMLEKRLTDFDSKL RVSPRDL  
GYQRLRNSTDFTSLRAPKATPSEVEVSFPIFLRHKSGIGEAYAAAIFKSSRYQELPLSRFVK  
SMPDMIYYIELVNDLMSFYKEQLAGETANLIHLQHQS WKGGQGTGPYGSWTLLDTFS  
RLCDETRDAAFRVDELLRLDECEKIANGELRGEEVGLSPMDVTMAAQWREFRDGYVS

WHLECQRYKLDFIKLSTFE

>ShSTS3(JGI ID: 122776)

MSTAKPEIPPMESFPPINVYPREA EIIKYCNNYVAEHFPFNND AEVKHFNGMEIPAYAC  
RVVSFARDHEKMRKVSILIVFYFIFDDWVDKNGMKLKDSTVMALLPPPSEVPIKPPQA  
GKMTLSDISAELYGAVRDDMPKADYDRMVNDMMEYLRVQRMAPGYNTLQELDLR  
SGEVGVYVLFRIIYAMELSVSGKELDDPLVKRAQVLGSEAGVLRNEASSYVKEVNEGS  
GAHNVITKLQEWSGCTEKEAMKQVLDAIEKRQEELREMCLKVTEAPHLSEDCKTFVK  
TIPYIVAGNTWWHHHSTRYAEGREVTVP

>ShSTS4(JGI ID: 52743)

MSETKVGKVAPFPPLPGAPYPPVRNHPRWKELYRLHDEWMMKYWPFSSSEKKRARIPF  
MNLAGFSTWCAPAADFDRMVWGARIAGIFFLADDYIDSGKMLDRIPGFKAAATGTGP  
LHKEDQAEICHDIVFRAIKATSHPRTFDQLTKCTHEWWDSNIHEPFQNLQYLAVRRV  
NIAMYFANAYFRYTL DINLTDEQVNHPLMREAEGIVSDHVGLTNDFFSYLKEKMTNSD  
DTNIIRILMDHEHLSYEEAKTVIEKKIRQKEQDFIGAGMAVLNDPELGKDREIYRWIAN  
LQYCMGGNLAWSQESGRYNVGVIDGISFPSLSYAAEPTPEDEVDDTEESRLRELIFNV  
KDIPPPDFTIDDDAIFMTNPHSHLQDNVPLPRPENVGIIGLEVYFPKRCISIDALED  
FDGVAKGKYTIGLGQQYLAFDREDINSFALS AVSSLLEKYNIDPRSIGRLDVGTTIDKS  
KSVKTTLMDLFAASGNHDVEGIDSKNACYGSTAAVLNAVNWIESSSWDGRYAIVFAG  
DIAIYAEGPARPVGGAGAVALLIGPDAPLVLEPTHGSYMAN TYDFYKPRMESEYPVVD  
GPSSVTYITALDESFKAYQRKVQEGSSRDVPPPYANGANGKASATKSVKLSDFDYSVF  
HSPYGLVQKAYGRLTYHDFVAHPTAPVYRDLPTDILSKDASATLTDKSVEKTFAAASA  
SMYKQVVTPSLNISNRCGNMYTGSLYGGLASLLTSIPSYELFDKRISMFA YGSGCASTFFA  
IKVRGDTSHIKAKLDLERRLAEMDVRPCEDYVVALKLREETHNAPSYIPNDS DAGLWP  
GSYRLEAVDGKYRRSYTVTH

>ShSTS5(JGI ID: 161672)

MELSSLRPFPA SFVLPNLANITRQAFNLKLNPHSQSANSAMKSWFKSFHVYDEQKSRE  
FLEAGKFDLYAALSFPDADLQHLETCLAFFFWAFSTDDLSD EGDLSQSKPEEVQVGVDIS  
TSALSSHAPTS LDFPYAAMLQSLFNRIKTTATKGASERFIQAFKDWSSSQVMQSRNRSK  
LLLPSVEDFILMRRNTIGAALVEAMIEYSLDLDLPDYVFRDPVVIAMSEATTDIMTWP  
NDLCSFNKEQADGDYQNLVCC LMAQYDLGLQDAVDRLVGMISTRVRDYITLKEQLPLF  
GAEVDTMLRKYHAAL EHYVQGTIVWYYSSPRYFHGEQIIEKESTRIILFSKASSKDCS

>ShSTS7(JGI ID: 167646)

MPHSTVHSHTLISDDSVLLFPDLISY CAYPLRVNPNYGRSVADD SERWLLNGAHLSDKKR  
KAFLRLRAGDLASMCYPDASAKSLRVVADYMN YLFKLDDWTDEFEAEDVDGMRDC  
VLAALRDPLHYETDKAVGKLAKSFFGRFVQHGGPLR TKRFIDTMVLFFRAVRQQALD  
RTYDDIPDLESYIALRRDTSGCKPCFALIEFAGGYDLPDAVVEHPSIQILQDATNDLVTW  
SNDIFSYNVEQSRGDTHNMVVVLMHEQGLAVQE AIDAVADLCERSIDTFEQTRRSLPS  
WGPIVDSNVESYIDGLQNWII GSLHWSFLTERYFGKDRRDV KRKLFVKLLAKRC

>ShSTS8(JGI ID: 146390)

MPAIIRQFILPDLFALSSAFP DATNPHWKRACTESRDWVNSYRVFSDEERRAFFTQGQS  
ELLCSHAYPYAGYE QFRTCCDFINLLFVLDEISDEQTADGAWATGRIFLQVLQDPEWDD  
GSKVAQMTRDLRARVVSTGVKPH TFRRLVHMC RDYIASVVEEAGLRERGEVL DIESYIE  
LRRNNSAVLTCFALIPYILGIDLPDEVVNDPNFSALNLA AVDMVCWANDIYSYDMEQA  
KGLEGNNIMTVLTEMHGLTMQD ASDYVGEQYKALMDLFLDNQAALRSFGPSVDAD



VRRYVDAVRHWPRGNLSWSFETPRYFREKREEIENTRVVILRPRPEPKMKSQN

>ShSTS10(JGI ID: 111121)

MGATSTTQIPHSTSLESYILPDLLRLSSPFKASMNPHWATTASESSAWFSSYSIFSdqELTE  
FAVCKVELLVAYAYPHANYETFRtCCDFMNLIFAIDEISDMQNGEDAGETGDVFLNAL  
RDAEWTDGSALAEMTRDFRARFLRSAGPQSFRRLKvSEdYIDCVtKEAGYRERSQILD  
MESFKHLRRDnSGVPLMLGLLEYTLGIDLPDVVFEDtALSRIYWAaVDMVWWANDV  
YSYKVEQAKGLAGNNILSVLMAAKNIDLQDASDYVGdVYAGLMKEYTEAKAELVSKS  
FGSKELDAAVKKYVDKMENWPIGNLEWSFASMRYFGSQSGEIKRTRTVMLRPQDVL

>ShSTS11(JGI ID: 128017)

MAAPESSAWVSSYNLFSDRKRTDFITGSNELLVSHTYPhADYDAFRtCCDFVnLLFVID  
EISDDQSGKAARRTGEVYLNAMRDPEWTDGSDLAKMTQQFRARFLRSVGpQSFRRFL  
RHSEdYIDCvAKEAEYRERGQVLDMDsFKSLRRENSAIRLCFGLFEFTLGIDLPDSVFED  
ETFMKMYWASADMVCWANDVSYNVEQAKGHSGNNIVTVLMAARDIDMQAASDY  
VGEYYAELMEEYMTAKAELASKSFGSRDLDEDVWKYVNAMENWPIGNLEWSFKTNR  
YFGTLHDEVKRTRLVVIKPRKVvV

>ShSTS12(JGI ID: 111127)

MQTPPSCESYILPDLLHISQPFKASTNPHWLKAAPESSAWVSSYRIFTDRKRMEFILGSN  
ELLASHTYPQANYDTFRtCCDFINLLFVIDEISDDQSGEGARLTGKVFLNAMRDPECTD  
GSILAKMTRDFRARLLQSIGAQSFRRFLKILEdYIESVtKEAEYREHGyVLDMEQFKILR  
RQNSAVRCAFGMVEHTLGIDLDPDVVFEDATFMKVYWAaIDMVWCANVNMFPpPGY  
LIQDVYSYSMELAKGDNHSANNIMSVFMAANGVSLQAASDYVGRHYARLMEEYLSA  
RAELASKSFGSQELDSdVLKYIDAMENWPIGNIEWSFKTSRYFGPQNDEVKQTLVVKL  
KPQEVPA

>ShSTS13(JGI ID: 50042)

MPDLFTAwpWKTTRNPLYLEAKADSDGWLATFGDFFQKYKDCILDCDGKRLRCAGD  
VNTLLFVVDdILDYEDDATVKERMRLMDAMENPFKPRPDGEWIVGEMTRQFWERTI  
KVSNTLSQERFMEGVRDCMAGMVRESLARKASRQHDSIHGFLKTRRDSAGCNLVFAL  
SELEVAVPAEAMKHSQIRELIAIIQDISCIANDTFsYRREQSRGRTEdNIITVVMNNLGTD  
IPGAIDWVENHHKELMKEFIEKHDKVPKWGEPTDSKVKNYIESLAGWVWANARWSF  
ECRRYMGDEGMEIMEKSRWVRAIPKERI

>ShSTS15(JGI ID: 64702)

MVRSPVSDKFCIPDTLASWPYPRILNPHYAEeKAASAAWTKGFGAFGPKAQDAFDRC  
DFKRCRSGCDLMNLFFVIDEHSDTHGEETVRKMkdVVMdAIRNPHKPRPNDEWIGG  
EIARQFWERAMCYASEISQRRFIDTFDEYLESVVDQAADRDSARIRDIESYINIRNTIGA  
KPSFVIMEQGMDIPDNVFEneVFQRLRMATIDMLCLGNDIVSYNIEQARGDDSHNIVR  
IVMNELDTDVPRAMDWVAQRHTQLEREFFtALSELPTWGEPIDGWVKEYVYGLGNW  
VRANDQWSFESQRYFGTKGMEIMKSRWLSVLPKVRPAEVGPQLVDQSL

>ShSTS16(JGI ID: 73029)

MAVATSVATPVPTPAYsAGRAPAKEKKIYLPDTLAEWpWPRAINPHYAEAKEESQAWA  
ASFNAFSPKAQHAFNRCDFNLLASLAYPLATKHGCRSGCDLMNLFFVIDEYSdIAPVE  
EVRQQKDIVMDALRNPHKPRPEGEWVGGEVARQFWALTITNAsAQSQKHFIETfDEY  
LDSVVQQAEDRSESRIrdIQSYIDVRRNTIGAKPSFALLELDMDLPDEVLAHPTIQSLSL  
ATIDMLCLGNDIVSYNLEQARGDASHNIITIVMNELNLDVNGAMRWVGDFHKQLEK  
QFFeAFNNLPKWGNAELDAQIAVYCDGLGNWVRANDQWSFESERYFGARGLEIMET

KTLAMMPIQRTEALGPQLVDDSI

>ShSTS17(JGI ID: 69906)

MSQTYTIPDTLANWPPWKRKINQHYEEVKMESASWARSFHAFSPQAQDAFDRCDFKR  
LRTGCDLMNLFVIDEHSDDLSSVADAETQAQIIMNALMNPEKPRPHGEWVGGEVARQ  
YWELAIKTATPKSQRRFVAAFDDYMNNAVQQAKDRTHSTIRDIDSYMEVRRKTIGAWP  
SFALLELDMDLPEDFMDHPVMHELHVLSISMICLGNVSDIAPLPSDIVSWNLEQSRGD  
DTHNIVRIVMNQLDTDINGAMAWVEMYHKELEVKFMDIFTKSQEWNKSMNKDISRY  
VEGLGNWVRANDQWSFESKRYFGDRGLEIMSKRTVSMMPKRNDVLNGTQLDIGPVI  
VDGSIL

>ShSTS18(JGI ID: 25180)

PRHINPHYQEVKKASAAWAESFGAFNPKAQHAYNACDFKRLRTGCDLMNMFFVFDE  
YSDVSSPKDVIQQAIIIMDALRNPYAPRPDDEWVGGEVTRQFWKRAIKTATAGAQRFF  
IDAFESYTQSVVQQAQKDRHHGFIIRDVDSYLEMRRETIGAKPSFVVLQMDMTLPDEVLA  
HPVIQQLSALSTDMICLGNRRLIQILWTVQDICSYNVEQARGDDLHNIITIAMNQFDIDI  
AGAMDWVVKYHAKLERKFLYLYNNGLPWSWGKELDPQVERYVCGL

>HS-HMGS

MSETKVGKVAPFPPLPGAPYPPVRNHPRWKELYRLHDEWMMKYWPFSSSEKKRARIPF  
MNLAGFSTWCAPAADFDRMVWGARIAGIFFLADDYIDSGKMLDRIPGFKAAATGTGP  
LHKEDQAEICHDIVFRAIKATSHPRTFDQLTKCTHEWWDSNIHEPFQNLQYLAVRRV  
NIAMYFANAYFRYTLNLTDEQVNHPLMREAEGIVSDHVGLTNDFFSYLKEKMTNSD  
DTNIIRILMDHEHLSYEEAKTVIEKKIRQKEQDFIGAGMAVLNDPELGKDREIYRWIAN  
LQYCMGGNLAWSQESGRYNVGVIDGISFPSLSYAAEPTPEDEVVDDTEESRLRELIFNV  
KDIPPPDFTIDDDAIFMTNPHSHLQDNVPLPRPENVGIIGLEVYFPKRCISIDALEDFD  
GVAKGKYTIGLGQQYLAFTDDREDINSFALSAVSSLLEKYNIDPRSIGRLDVGTTETLIDKS  
KSVKTTLMDLFAASGNHDVEGIDSKNACYGSTAAVLNAVNWIESSSWDGRYAIVFAG  
DIAIYAEGPARPVGGAGAVALLIGPDAPLVLEPTHGSYMANITYDFYKPRMESEYPVVD  
GPSSVTITYITALDESFKAYQRKVQEGSSRDVPPPYANGANGKASATKSVKLSDFDYVSF  
HSPYGLKVQKAYGRLTYHDFVAHPTAPVYRDLPTDILSKDASATLTDKSVEKTFAAASA  
SMYKQVVTPSLNISNRCGNMYTGSLYGGLASLLTSIPSYELFDKRISMFAYGSGCASTFFA  
IKVRGDTSHIKAKLDLERRLAEMDVRPCEDYVVALKLREETHNAPSYPNDSDAGLWP  
GSYRLEAVDGKYRRSYTVTH

>Hetan2\_454193(JGI ID: Hetan2\_454193)

MAQKIYIPDTLANWKWPPHLNPHYPEVKRESAAWLASFAGFSPKAQDAFDRCDFNL  
LASFAYPLAKKEHLRSGCDLMNLFVIDEYSDVAEAEDEVQRQADIVMDALRNPHKPR  
PKGEWVGGEVTRQFWELAIKTAS PQSQKRFIATFDITYTQSVVQQAADRTHSYIRDIKSY  
FEVRRNTIGAKPSFALLELEMDLPDKVIEHPHQDLTIDMLHLGNDIASYNLEQARG  
DDSHNIVTIAMNQLKTDVAGAMKWVDNHHKELERKFNFESFEKLPKWGEPIQSQVAR  
YVDGLGNWVRANDQWSFVSERYFGKKGPEIMKSRWVTLLPKERTEDIGPQVVDSSL

>BvCS(Genbank ID: KU668561.1)

MSTASSPSLVASEIDSPHHSRTSSPSTLSPTLSFILPDLVSHCNFPLTYHPAGDEQAAASL  
AWMLSFVPHFTPKKVAAMNGLQAGELTAYCYHDCPPERLRVDDFMNYLFHLDNIS  
DGMMAKNTTQLADWVMNAFEWPEKFQPTVNADGEVVEEIAAVKLARDYWSRCIQ  
QAKPGVQQRFKSSMNMFQAVEQQTNDRDQGQVVPDLESYIDMRRDTS GCKPVFDLIE  
YALGFELPEEVVDHPVIKALNQDANDLVTWSNDVFSYNVEQARGDTHNMICIFMEH

DGCTLQEAI DRV GGLCKQTIDAFVENKARVPSFAHLGPEVDAWTTGYVQGLQDWIVG  
SLHWSFMTKRYFQEAGAEVKKTRFVKLLPIEEGRHKHIPPIYASAMVAATA

>Sphst\_47084(JGI ID: Sphst\_47084)

MPLLSCSQTFRLPPLHETFSVFPDNLNPNYNACRAQSRAWISKY NVQVCGPKMRAF  
MDNCNFELSNAYVYPYAQPAGLRATMDLANILWLYDEY TDMQTGEDAAKAAVTVSK  
TLLNPEYDDDDTWICHMMRDFYVNIHQKCRPNVAHRFIENFCRYTEVVGTEAKLREKN  
EVL DIPGYVALRREISAVRTC FDLVEYCLDLDFPDYVHKDPIFVIGYNAAMD LFWWAND  
LFSYNSEQAKGHAAANVVTVIMTSKKMNLQSTVDFIAGFCEALTFQLLDAKRALSLH  
EDPTFSRDAVRCL EAFGDWVRGND AWSFATTRYFGPENKIVKETRIVKLKAPVEESVAL  
KE

>Copu2(Genbank ID: XP\_007771895)

MSTMDPSEFILPDFFATCPFAFGRTNPHADVVIPEAHAWIVKHVPFVDRKRDEFIQDGF  
QDLMPHCYPWAGKETLR TMCYLNLLFLVDDLTD DMNSDEARGFGESFIRVLNDPAV  
HDSSQVMQATREFRSRITGTGVTESRWFG RFLAIFKLYINAVCAEAEDRENKRILD LDTF  
TVARRENSAVMVFFAITEYALGIDL PDAVYEDPTFLRVYADSADMVILVNDVFSYNREQ  
AKGLDGNNNITVLMQTLDDLQA AVDHVGEMFSQKMEGCMRGRAMLP SWGVKVD  
ADVERFFDALDQWVVG NLEWSSQSPRYLGPEHEEIMRTRRVLRKVETEIE

>Copu3(Genbank ID: XP\_007765978)

MSATPAPTEFILPNLFSVCPLTFGRSNPYDEV IPEARAWIAKYNPFVDSKRAEFVQGCN  
ELLCSRVPYAGREEFR TCCDFVNLLFVLDELSDDMGGADARSTCDSFIRVLNDPDAP  
DTSLIAQMTREFRARVAERAKPGCLRRFIALCGTYVEAVCVEAELREQRVL DLRSFILL  
RRENSAVRCCLALAEYALGLELPDAVFNDPAFQSVYFCAADMVCWSNDVYSYNMEQ  
AKGHTGNNVVTVLMQEHGIDLQA AADRVGEVFGQLMEHYTSGSRSLPTWGGKVDA  
DAARFLEAAGQWVVG NLEWSFETPRYFGPDHDEV RDTHRVLK

>Copu5

MHLPEPFHFLLPDFSSHCSYPLRLNKHCVAAAAASEDWLIRLAQLRSPRNGRKLKKFM  
GLKAGYLTALCYPDCPRTEL RVVSDYMNFLFTLDDWSDEFAEAGVRGLEQCVMGMLY  
DPTVKTDKAAGRLARSFWLRMIRTAGPRVQH RFI VAFEDFFRAVEQQSRDRAKGVM P  
DLESYIALRRDTSGCRPVFVLA EYAAGIELPDEVFEHP IIQSMTEATNDLVTWSNDVFSY  
NKEQALGDTHNMITLLMAQHGLSLQGAVDFV GQLCAASITRFESGR TTLP SWGPDVD  
CDVQKYVMGLQDWIAGSLHWSFETERYFGKRGKEVRQAGVVKLSPMKAPKKV

>Copu9

MSPTATFTTTSSEENAPTKFILPDLVSDCTYPLLLNDNCEPVARASEQWLIAGARLQEPR  
RTKFMGLAGELTACYPHADASHLRVCVDFM NWLFNMDDWLDDFDVDDTWGMRH  
CCLGAFRDPVGFETDKLGGLMSKSFFSRFRQDGGPGCTERFIHTMDLFIAVAQQAGDR  
ANGITPDLESYITVRRDTSGCKPCFALIEYAAGIDL PDHVIYHPTLAAMEEATNDLVTW  
SNDIFSYNKEQVTDDTHNMIPVLMRERGLDLQGA VDFVGR LCKGTIERFETERARLPS  
WGPELDAQVQTYIEGLQNWIVGSLHWSFDSHRYFGKDGHAVKKHRIVKLLPKRVPQ  
QA

>PCSTS01

MQTQQTSSVSSSPRKIIIPDLVSHCTFPLRNNRHRKQATVECKRWLFKGGNLSQKKRD  
AFHGLKAGLLTSMCYPNAAFPQLRVCCDFM NWLFHMDNISDDMTDRGTANTGVDV  
MNALWLLDDYTP TTRVGKMARDFWRRAAVTAAPGAQQRFRETMDFFFQSVTQQAL  
DREAGVVPDLESYIALRRDTSGCKPCWALIEYAYNLHLPDEVMEHPTILALGEAANDL

VTWSNDIFSYNVEQSKGDTHNMIVVVMQQDGLDLQSAVDFVGDLCQQSIDRFVYER  
DNLPSWGPEIDRQVDIYVDGLRDWIVGSLHWSFESERYFAKSGLEVKKTRTVNLLPLRT  
AVAEPTQI

>PCSTS02

MQSFVLPDLFAVCPLVGSTNPHYAKAARESSAWIDGYRLFTDRKRAFFIQGSNELLVSH  
TYPYADYEQFRTCCDFVNLLFVVDEVSDQDGKGARSTGEVFLNVMCDPAWDDGSA  
LAQMTREFRARFMQYAGPNCARRFLVHCKDYVEAVAREAELRETGEILDVEAFKHLR  
RENSAIRLCFGLFEFALGVDLPDAVFEDETFTKLYWAAADMVCWANDVYSYKMEQAR  
GIDGNNIVTVLMHERGVDLQTAADLVGEHFARLMDTFLQTKRALPSWGLTLDTAVAA  
YVAAMEHWWIGNLEWSFETQRYFGPTHAEIKRTRVVELRPTEDAFDGDD

>PCSTS03

MSTYPALRSYRLPDLHPLCPFKARFNPHHEEAAAASKAWVLSFNALKGKKLEFFKEG  
GSELLCAWAYPYASLEGLRTACDFVNLLFTIDEISDEQNGNDALATGMSVWNTMKDD  
NYDDGTVLCRMTKDFKKRFFPYAGPATRRFLKHTEDYVLGFAREAELREKNVLSLA  
AYDPLRRENSAVRYCFGLFGYLLGMDLPDEIFEHPLYMEMHLAAVDMVCWANDVYSY  
DMEQSMGHLTNNILTVLQREKNIDLQAASDYVGVHFKELADKFEANKALLPSFGKEL  
DDVVAHHIMAMEAWVAGNLEWSFGTRRYFGKNHMKVRETLVVELSPPRVLDD

>PCSTS04

MPAIAPPSAPATYRLPDLHAVCGFKARFNVHYEEATAGSKAWYFSYKTLTGKRLEFFKE  
GGSELLCAWAYPYAGLGQLRAACDFVNLLFTVDEISDAQNGVDALATGMSFYNTLKD  
DNYDDGTVLCRMTKDFKKRFFPYAGAATARRFLEHTKNYVLGFAREAELREKNVLD  
LLASYEPARRENSAVRYAFGLFGYILGMDLPDEIFEHPYMEMHLAAVDMVCWSNDVY  
SYDMEQSLGLAANNILTVLQREKNVDLQTAADLVGSHFKVLVDKFEAAKARLPSFGK  
ELDEIVAHHILAMESWVAGNLEWSFGTRRYFGKSHLKVRETLVVELSPPKYLGD

>PCSTS06

MAPVIGTIEMPPASDGFGNPAKISPHERSEEEELPYLCRYVITEFLRRAGIQMPTFNAAS  
FGDEVDRLTFAEVAKWDIGNANPRRLHHHVVSAINIAKTAYAHTPVPTQVHIAMWTA  
LCIFVDDFEIETAAVEQFAERFHAGGPQLHPLLDVFAGTLRAMPRFFHAHGAAGIVAN  
TVQYVTSTLFDKVTEEKGLEVHASARDYPLYKRARNGIGEGYGFCIFDKENFPDVSTHI  
QVIPEAITYLIYVNDLLSFYKEELDGETKNFIHDRARVTGKDIEAALMDSMEDVIDAVN  
RGRQILQGEKERKAWDSFLVGYVAFHFISPRYKLERLLSGMN

>PCSTS08

MLVDLAGQLQARLRALVGVEYFKDFVAVNDERAGTEETCRNALRCFVGRVKIPARVM  
QPDPGTSVTQSLRATVKAWGCIDTTSAAACQKRVAATAITTLVFRHTRLDTQAYIAGY  
AFLAISLDDEAIGADALAAFAPRMLSGEPQGHVWVLDRLFIEHVQSAPTFFGAFSVAIA  
ACTVQFVNSTLDRTTSNRVCLTAGSLPYVLYKRAINGVGDSFALFAWEKDRFPDDSLFL  
QVLPDLCRFMEYTNILSFYKEELAGEKDNFVHDIMTVSELPAPGVLEGLVDAAAETV  
QRARLVLQDSEERKVFESMLEGYVAFHYTSPPRYRLGDLSGASPADSD

>PCSTS11

MCATLTDFLWQAEAAKHAVDSLRLRSAPLPEWKTMTFDADGTLERRIREVVADWEPA  
VTSLQGFERSILISAALGMSFNHSPMEVRLQVALYSLVIFLTDDCEIPAAALDEFMHRFY  
SGRPQLHPVLDHMEILHGMDEFFPPLAVKGIVQGTVDYMNVNAFEPAEKLPLHPA  
ALSYVTARRMKHGLAEPFLMFLDFKNYPDVSTWVQAVPDMMIYTNWANDIYSFHK  
EILADDVHTYILERA EVTGKDLTETLSEIVDEAVVACDNVRKILKGTKALEAWESFVAG

YAAFHRYTPRYRLKELYGDEERDRM

>Denbi1\_659367(JGI ID:Denbi1\_659367)

MTVPIPTSTEQSSAPTRFFIPDTLANWPPRALNPAYEQCKADSAAWCEKYKAFSPKA  
QKAFNLCDFNLLASLAYAHLPEDVNRVGCGLMNLFFVVDEHSDAMDKNVHVWVEI  
IMDALRNPTKPRPDDEPIVGEISRTF  
WENAIKCLGPTSQKRFIETFETYLYAVIVQADDRDHHVFRDVDSYMVVRRDTIGAKPSF  
ALLEHNMDLPDDVFNHPLLEDLRTWCIDMLILGNDLCSYNVEQSRGDDGHNIVKLV  
MLQENIDLHGAMQYISDMHDDLADK  
FLRNYKNMPSWGQPIDEWVTRYIEGLGNWVRANDAWSFESWRYFKYDGLRIQKERW  
VELLPANKEDLTSSSE

>SiTPS(JGI ID: 77541)

MPSVSPATIRLPDILGAMDRFELRTHPDEREVTRASNEWFNSYNMMPPALFEKFKCD  
FGLMTGMSYPDTDATRLRITCDYMSILFAYDDLMDLPSSDLMHDKIASDKAAKIMMG  
VLTHPHKFRPYAGLPVATAFHDFWTRFCATSTPKMQKRFTDTTYEYVMAVKNQCGNR  
QSSRCPTIEEYVALRRDTSIAKVTYACIEYCLNIDVPDEAFYHPSVAALQEAGNDILSWA  
NDVYSFDNEQSSGDCHNLVAIVAINKNITVQAAMEYVMGMIDSAIERFFEECANVPSF  
GPEVDPLVQAYIKGVELYLSGSVFWHLESSERYFGARVQHVKDTLMVELRPLDEGAKP  
AFDLMYKLPSNLTPEVLSAAAVSAAPAAPVAPASPAPQPEILSPTPISPINVNPLGNVA  
CPPPSYETQRVLAKMVATVEEKQRLAYSQPAEQYYSPAPQYYPSQPVEKFQQTNVLETA  
FKGSNSELTNILVIASVLMAGSPMALVPFVPLLALLLLPNETPVAPVA

>SbTps1

MVNSSSSPSPLLVPPLVPLPSPSTVRSSTKPLPEGFILPDLVSHCKFPLSYNPHGDVVAAQ  
ADIWLDKGCPELTPKMRKALYGLHAGELTAYCYTSCDAHRLRVISDFMNYLFHLDNIS  
DGMMTRDADVLSDIVMNALVFPHEYKPCKGQPAEEISAGKLARDYVLRICIADAGPDV  
QARFKENLQLFFEAVHIQATHREDGEIPDLETYIDVRRDESGCKPVFDLIEYGLGINLPD  
FVIEHPIIKALNQGSNDLVTVSNDIFSYNVEQARGDTHNMIILVQRYGMELQDAMDYV  
GEMMCRVTMENFVANKARLPSFGCELDLDRDVAGYVQGLQDVIVGALHWSFMSQRYF  
GTEGAEGAEEVKKHRYVKLLPKKCTTTTPAAGTETRSECLSQTTADDIETTYLPTRLIYQA  
GRSMRNIAWLLQFFSRRHEVCS

>Denbi1\_816208(JGI ID: Denbi1\_816208)

This sequence is not available.
